# Supplementary material for: Quantification of N-terminal amyloid-β isoforms reveals isomers are the most abundant form of the amyloid-β peptide in sporadic Alzheimer’s disease
Source: Oxford University Press journal article supplement (doi:10.1093/braincomms/fcab028), 2021-03-04

D A E F R H D S G Y E V H H Q

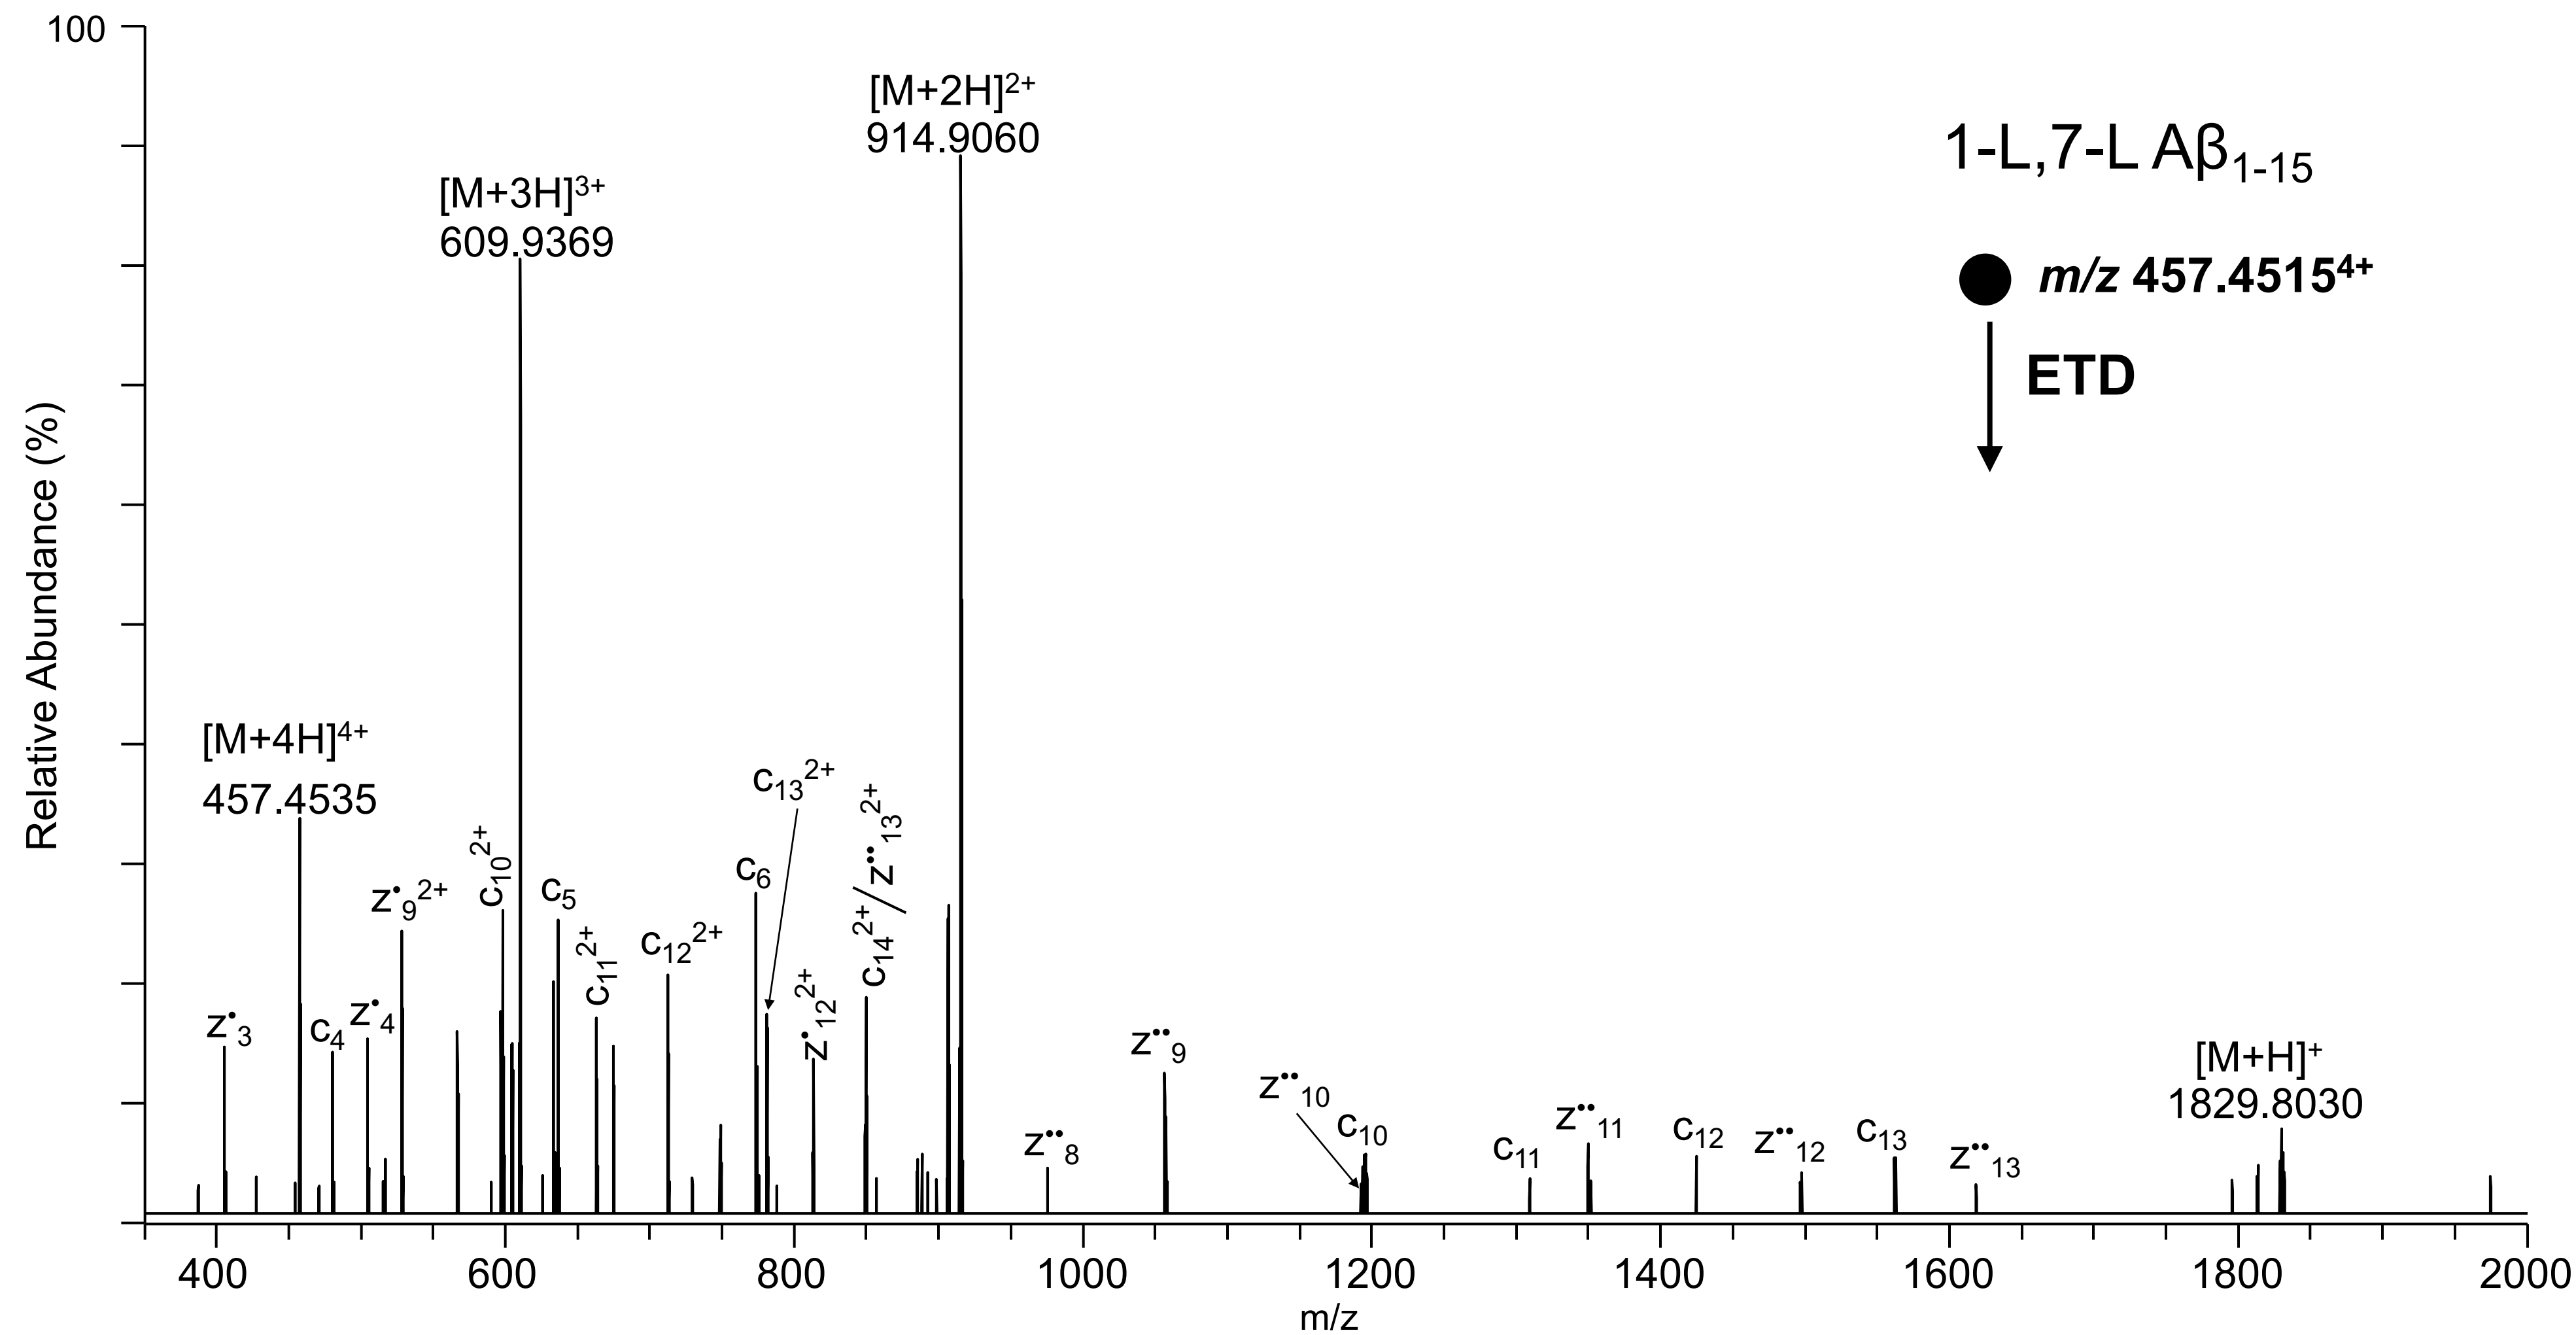

D A E F **R(+10)** H D S G Y E V H H Q

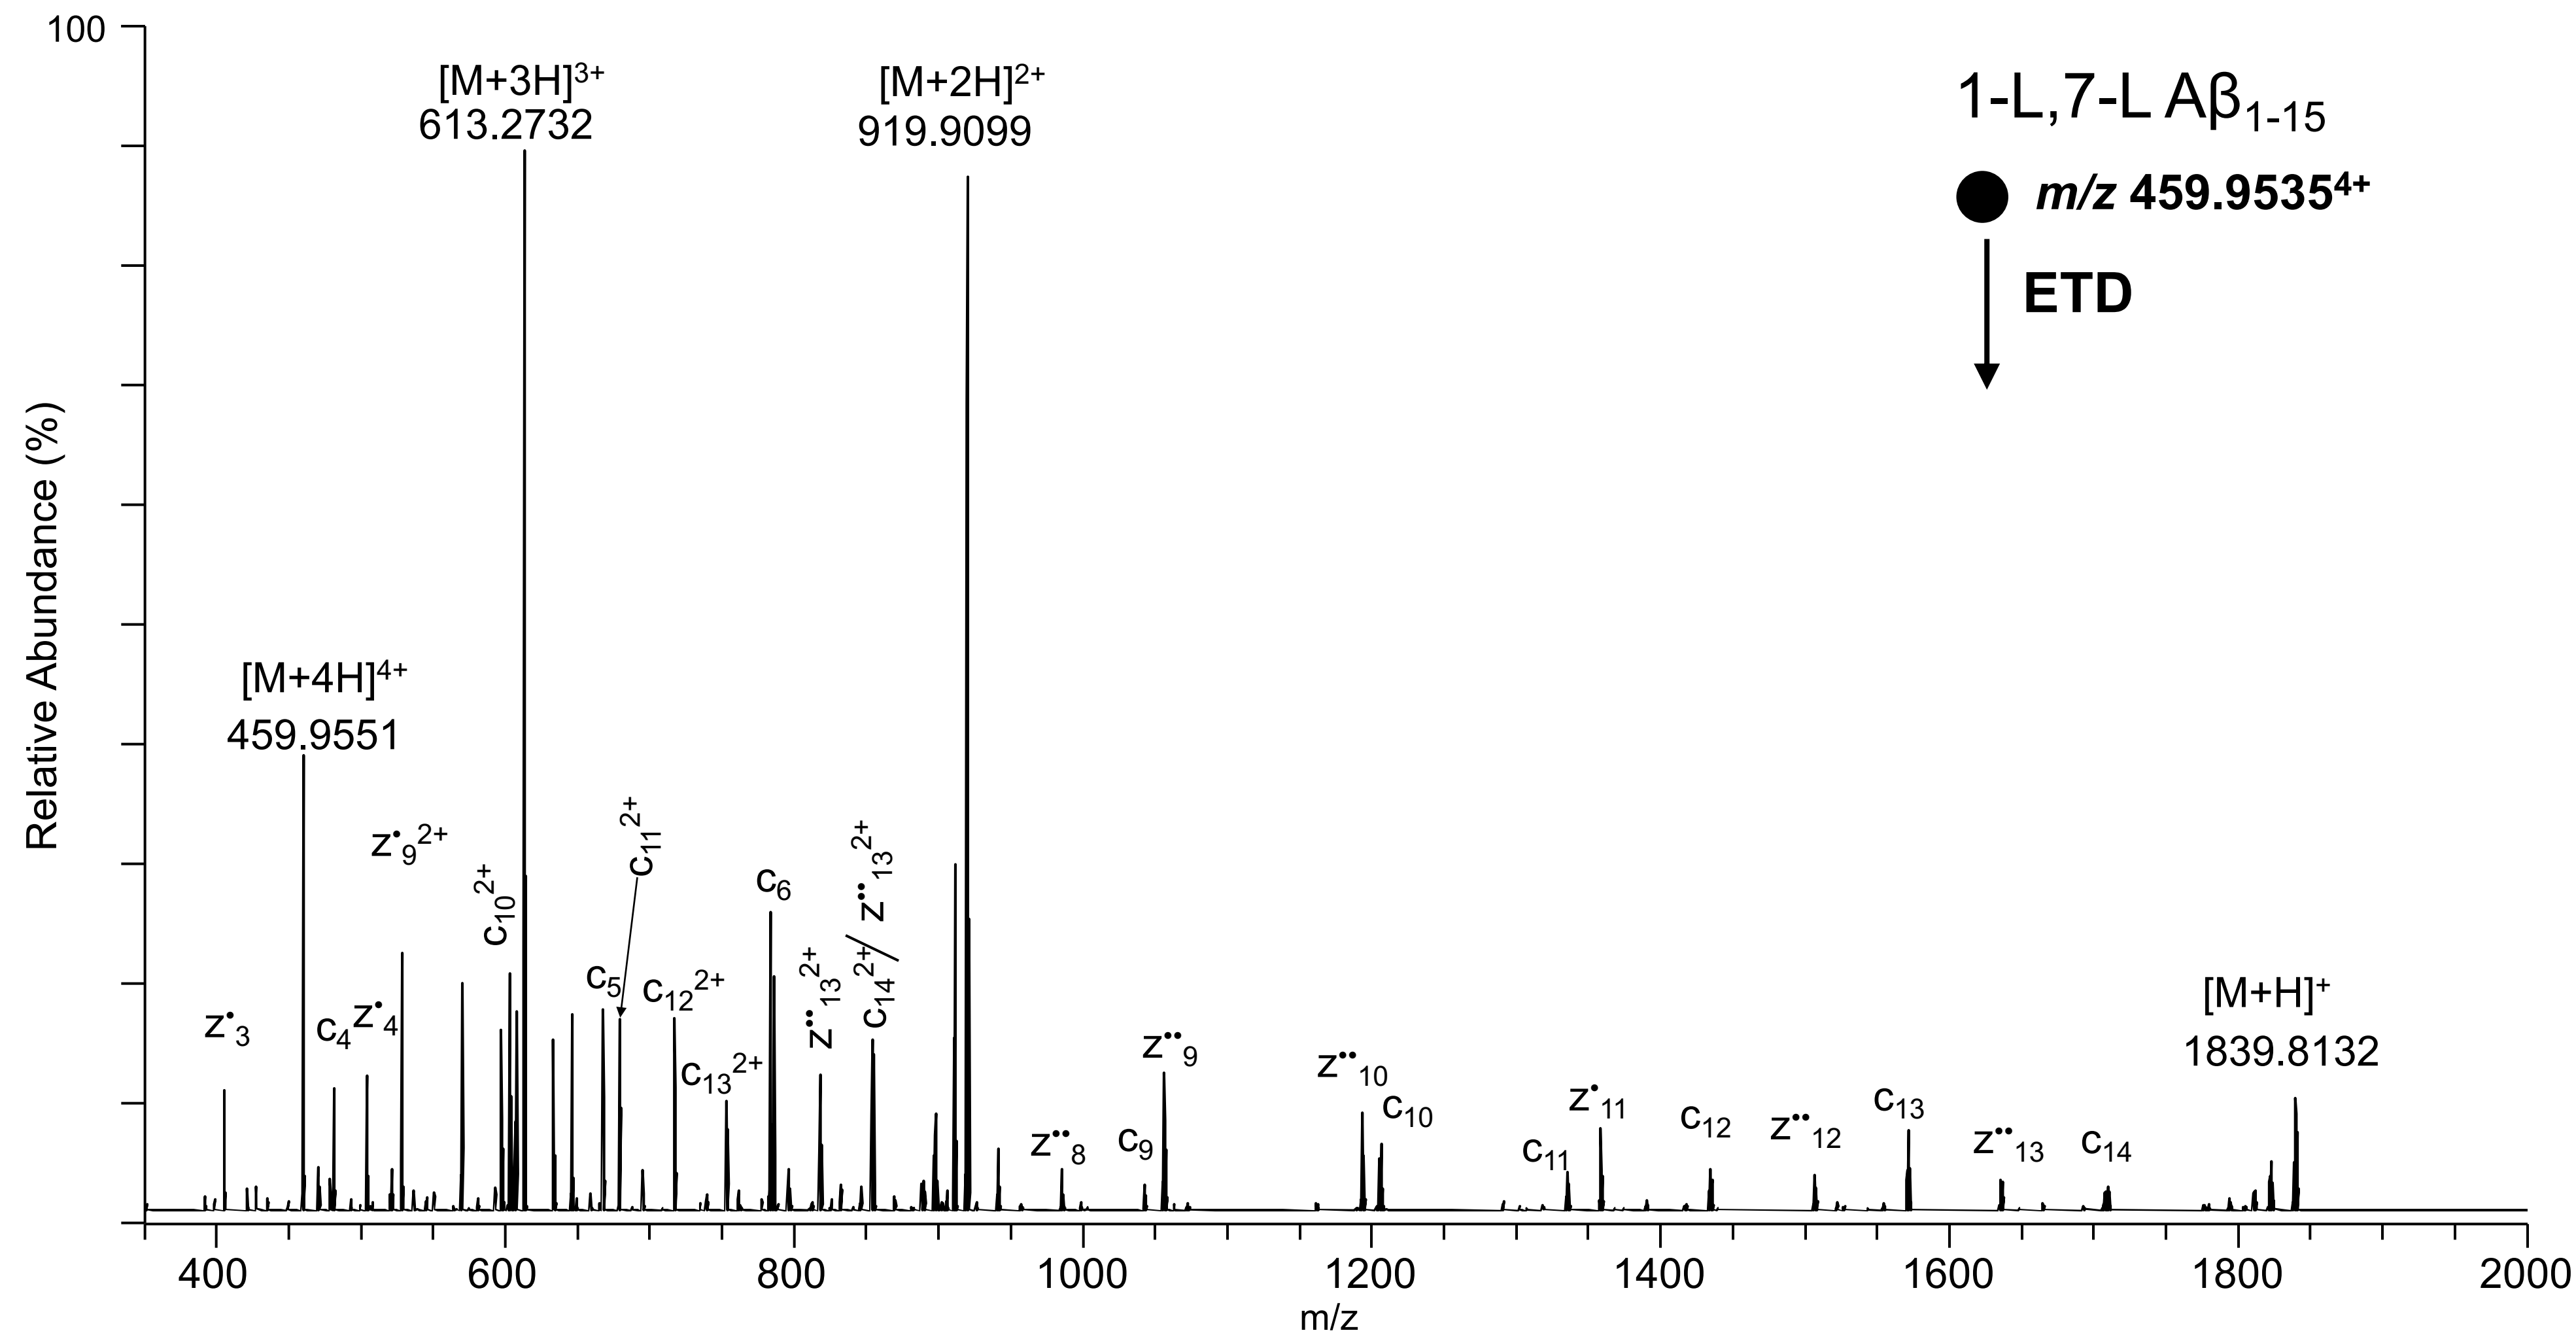

iD A E F R H D S G Y E V H H Q

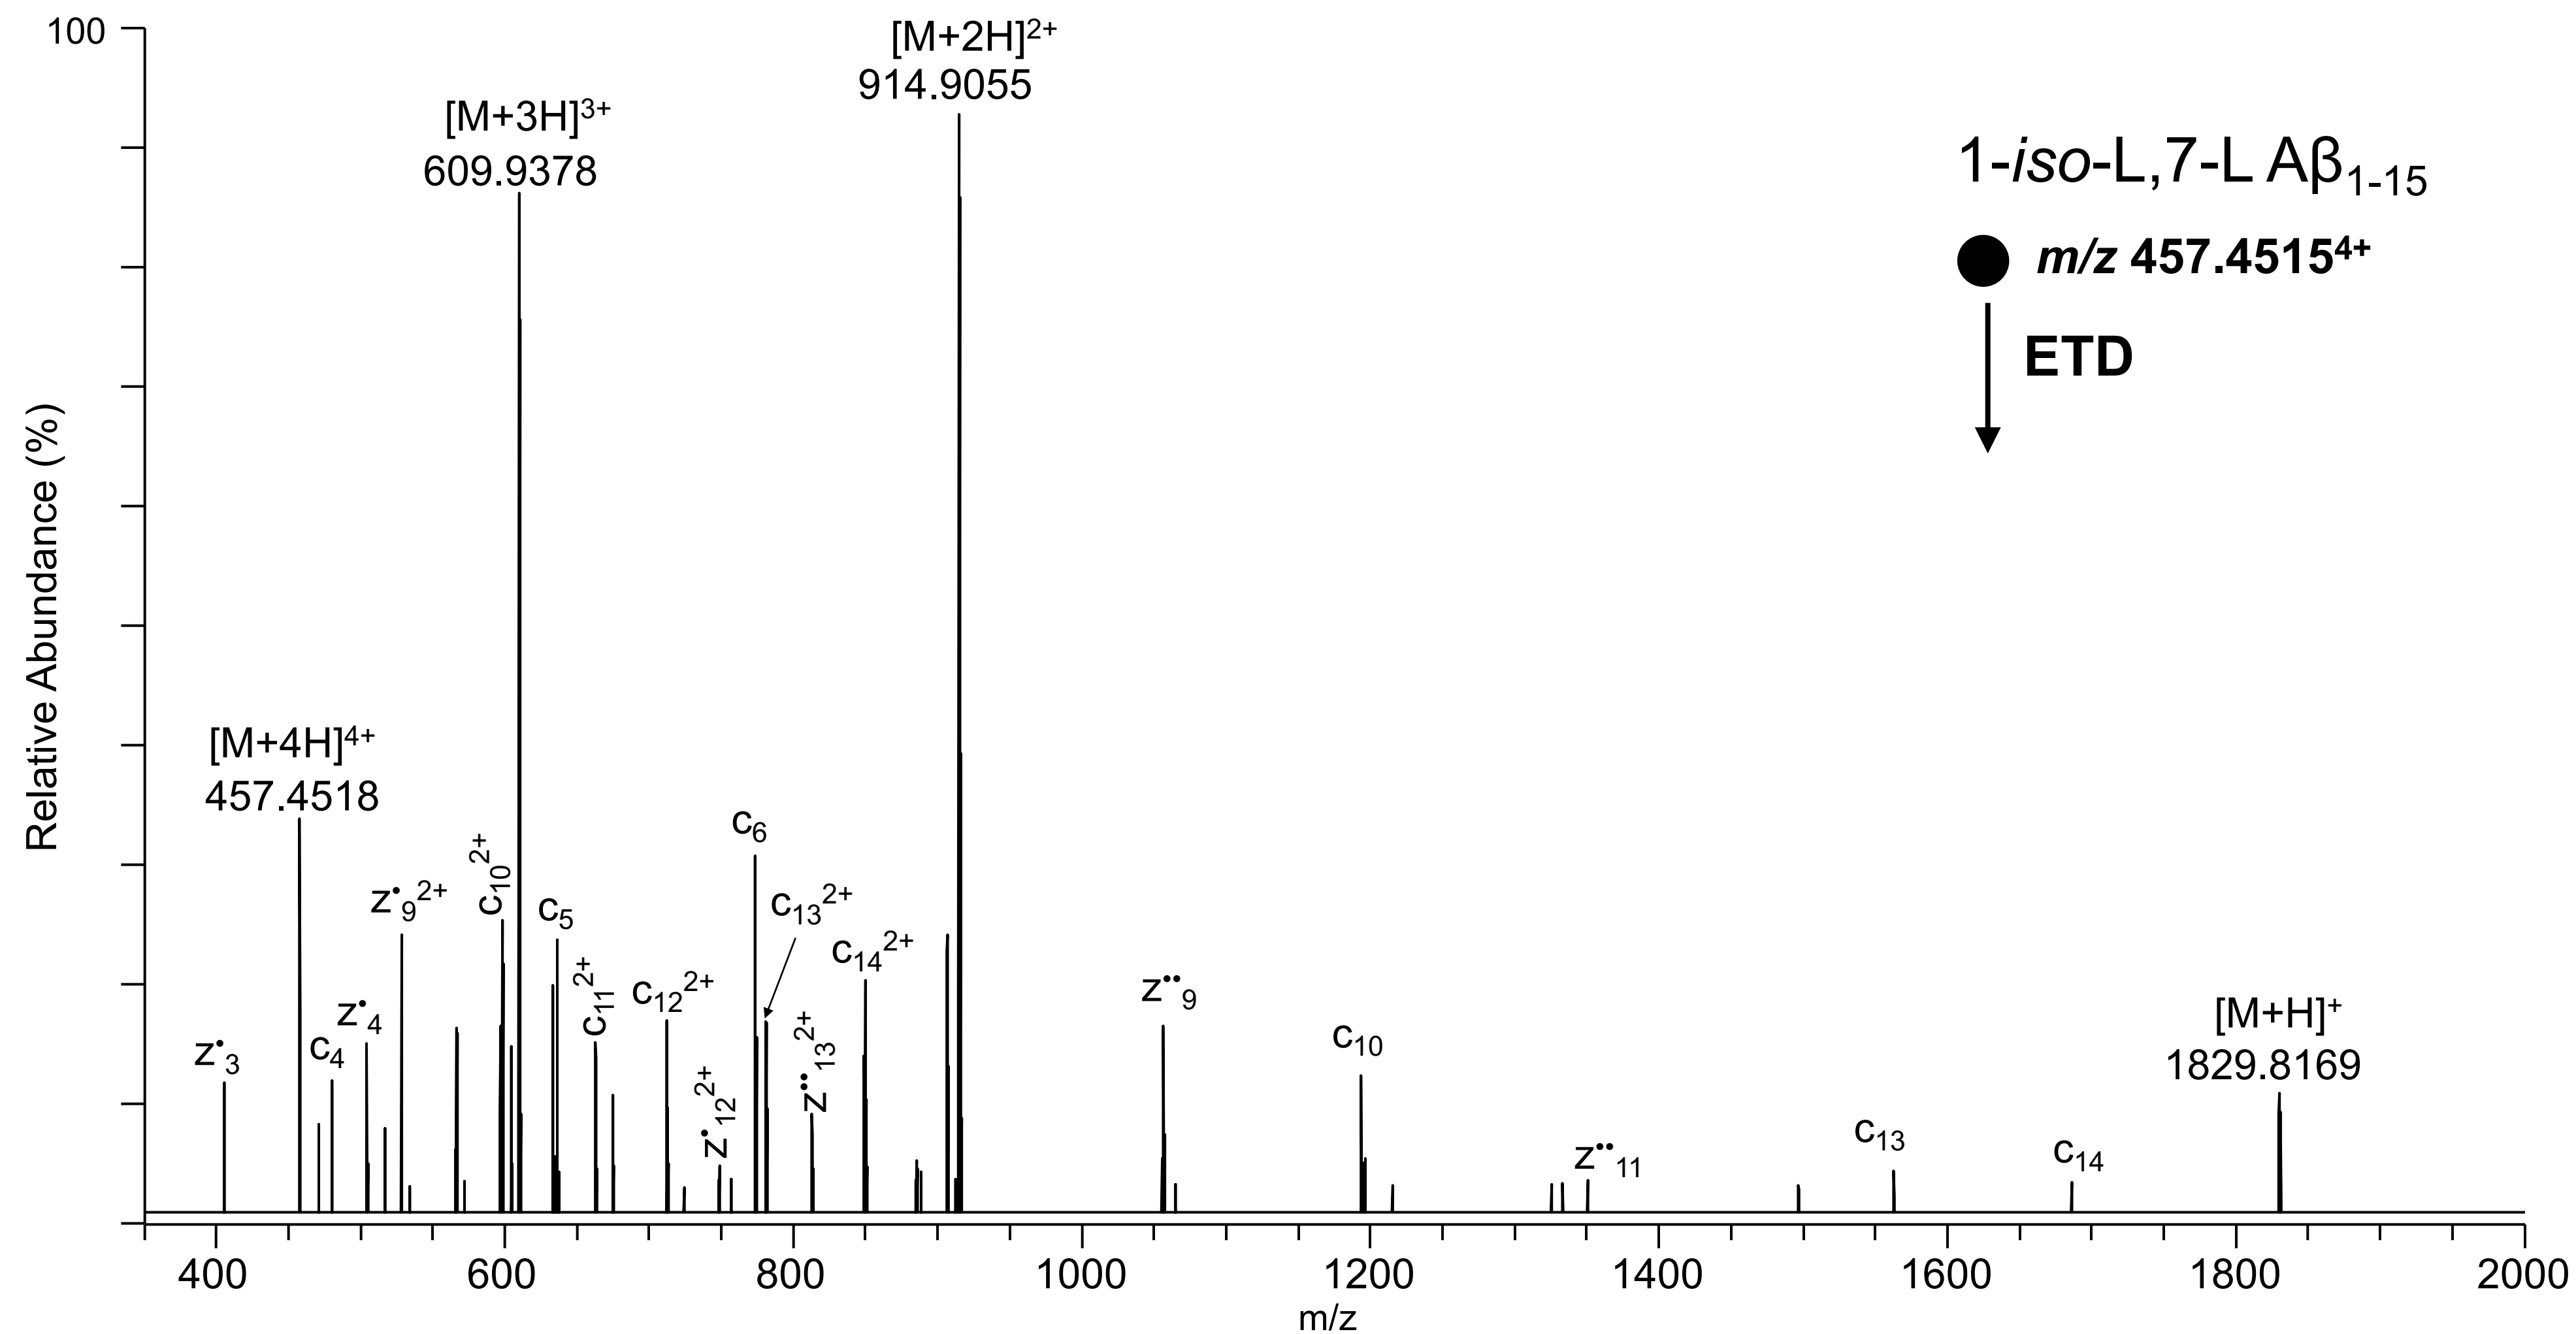

iD A E F R(+10) H D S G Y E V H H Q

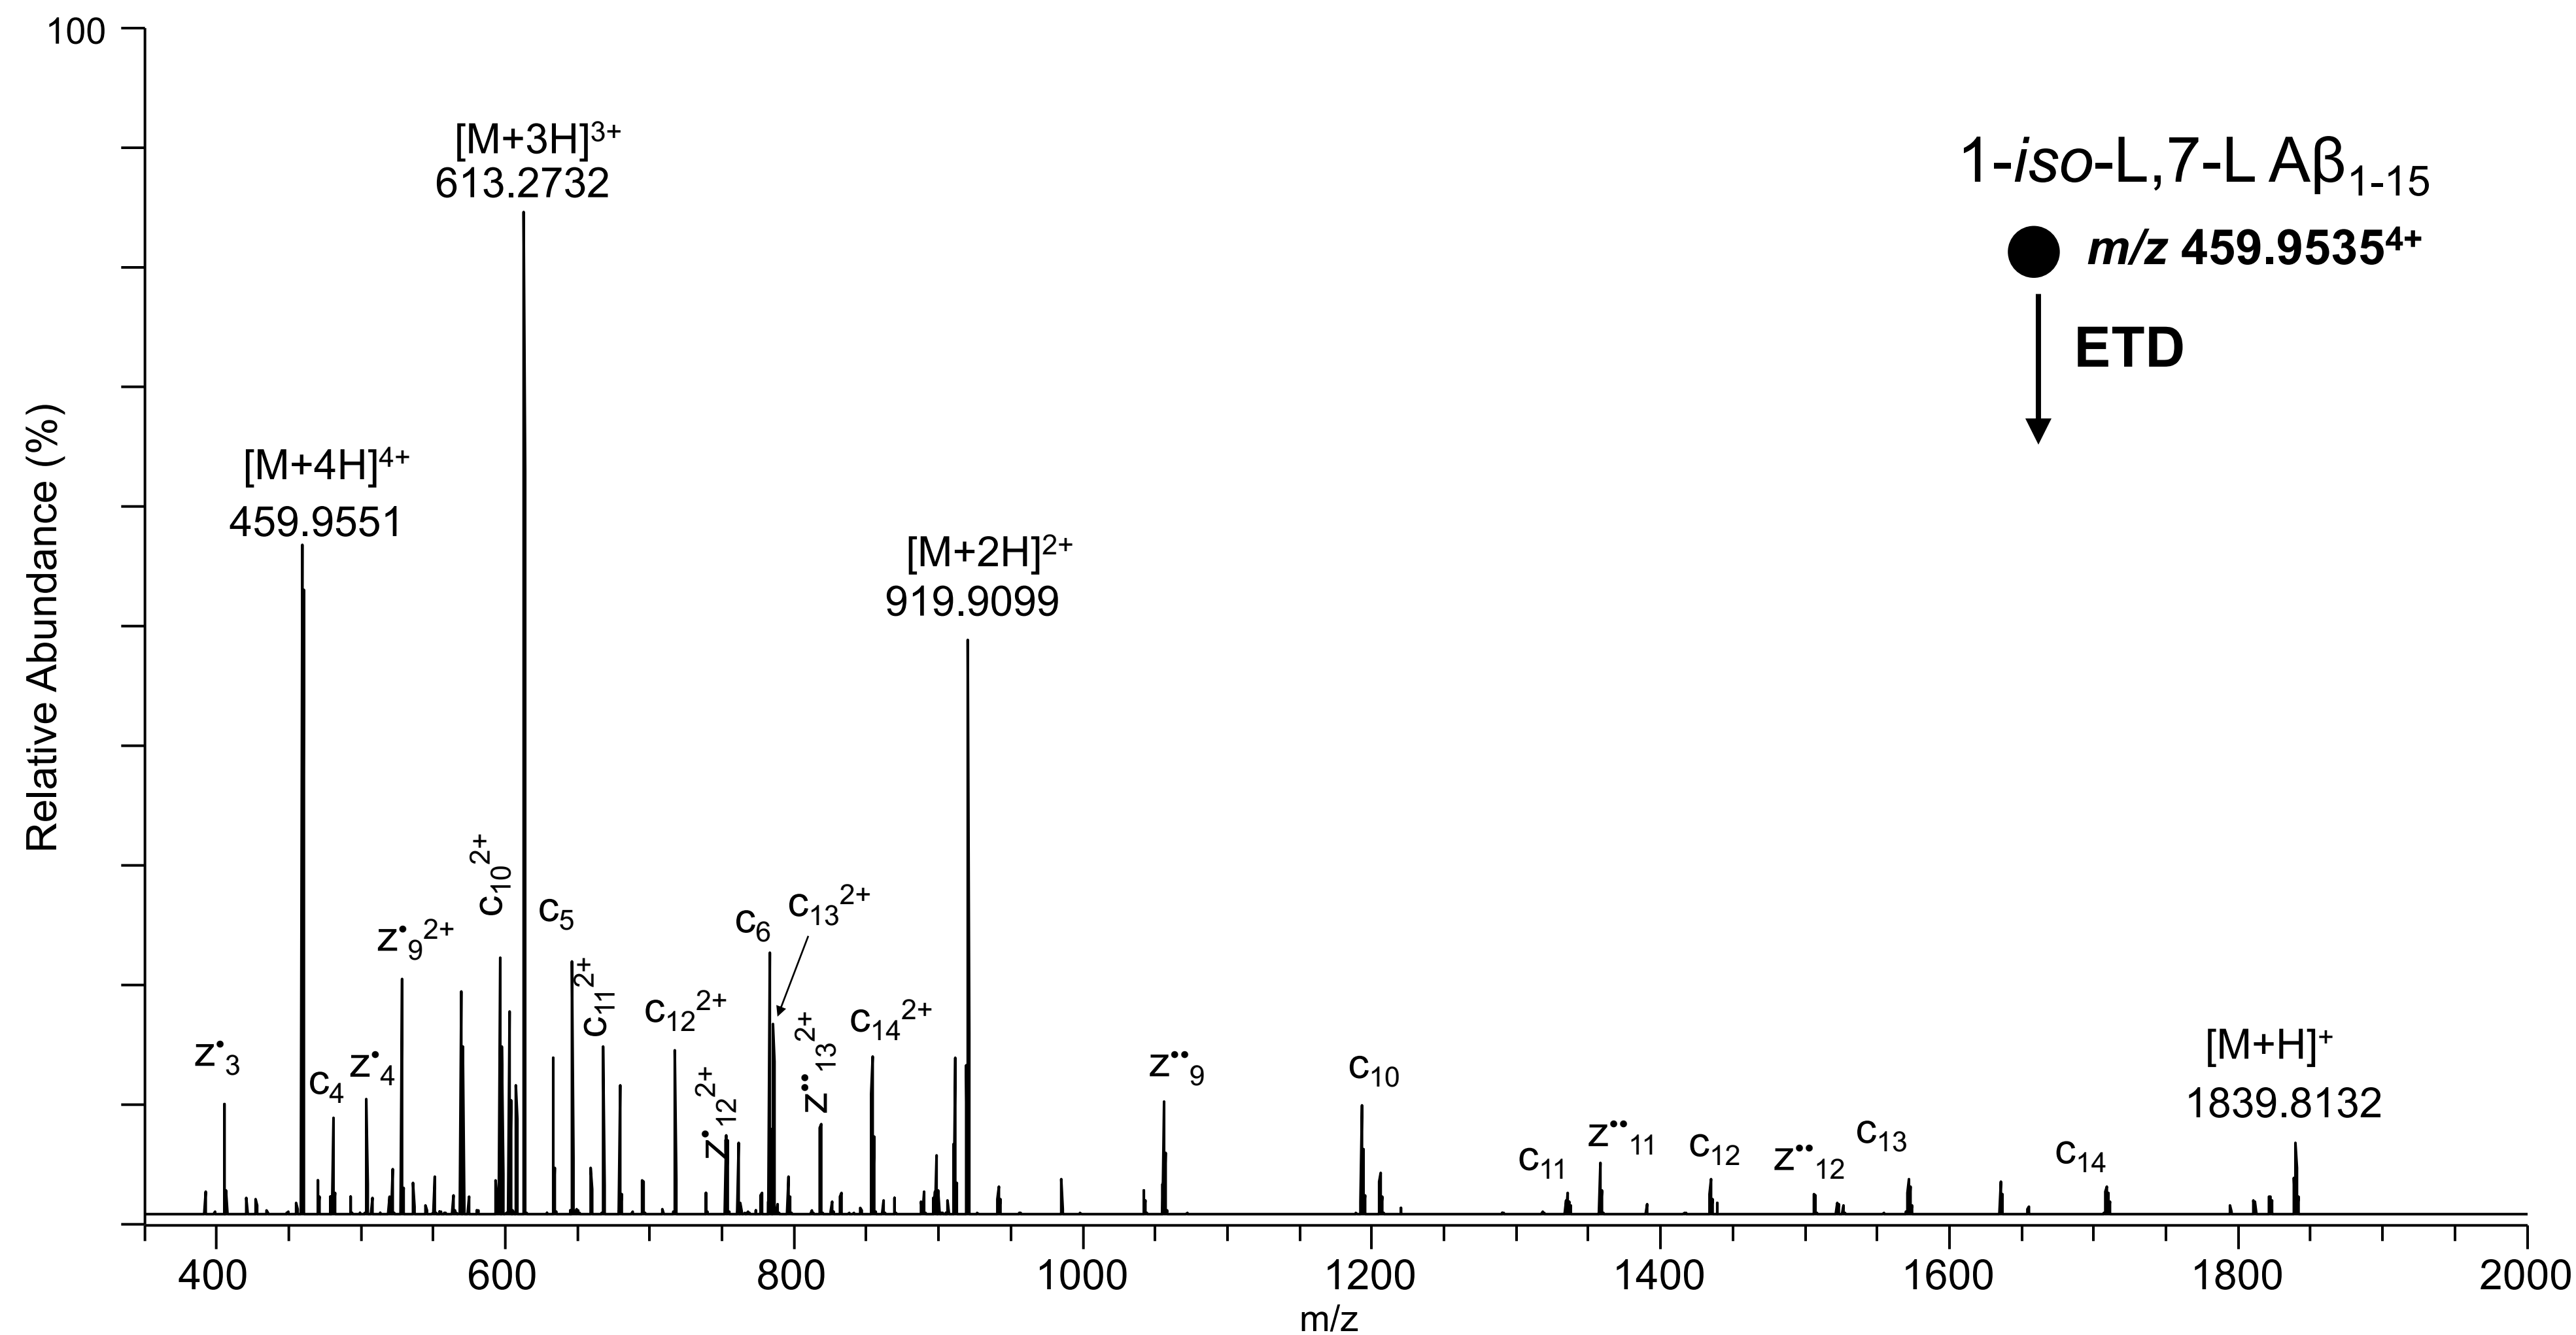

iD A E F R H iD S G Y E V H H Q

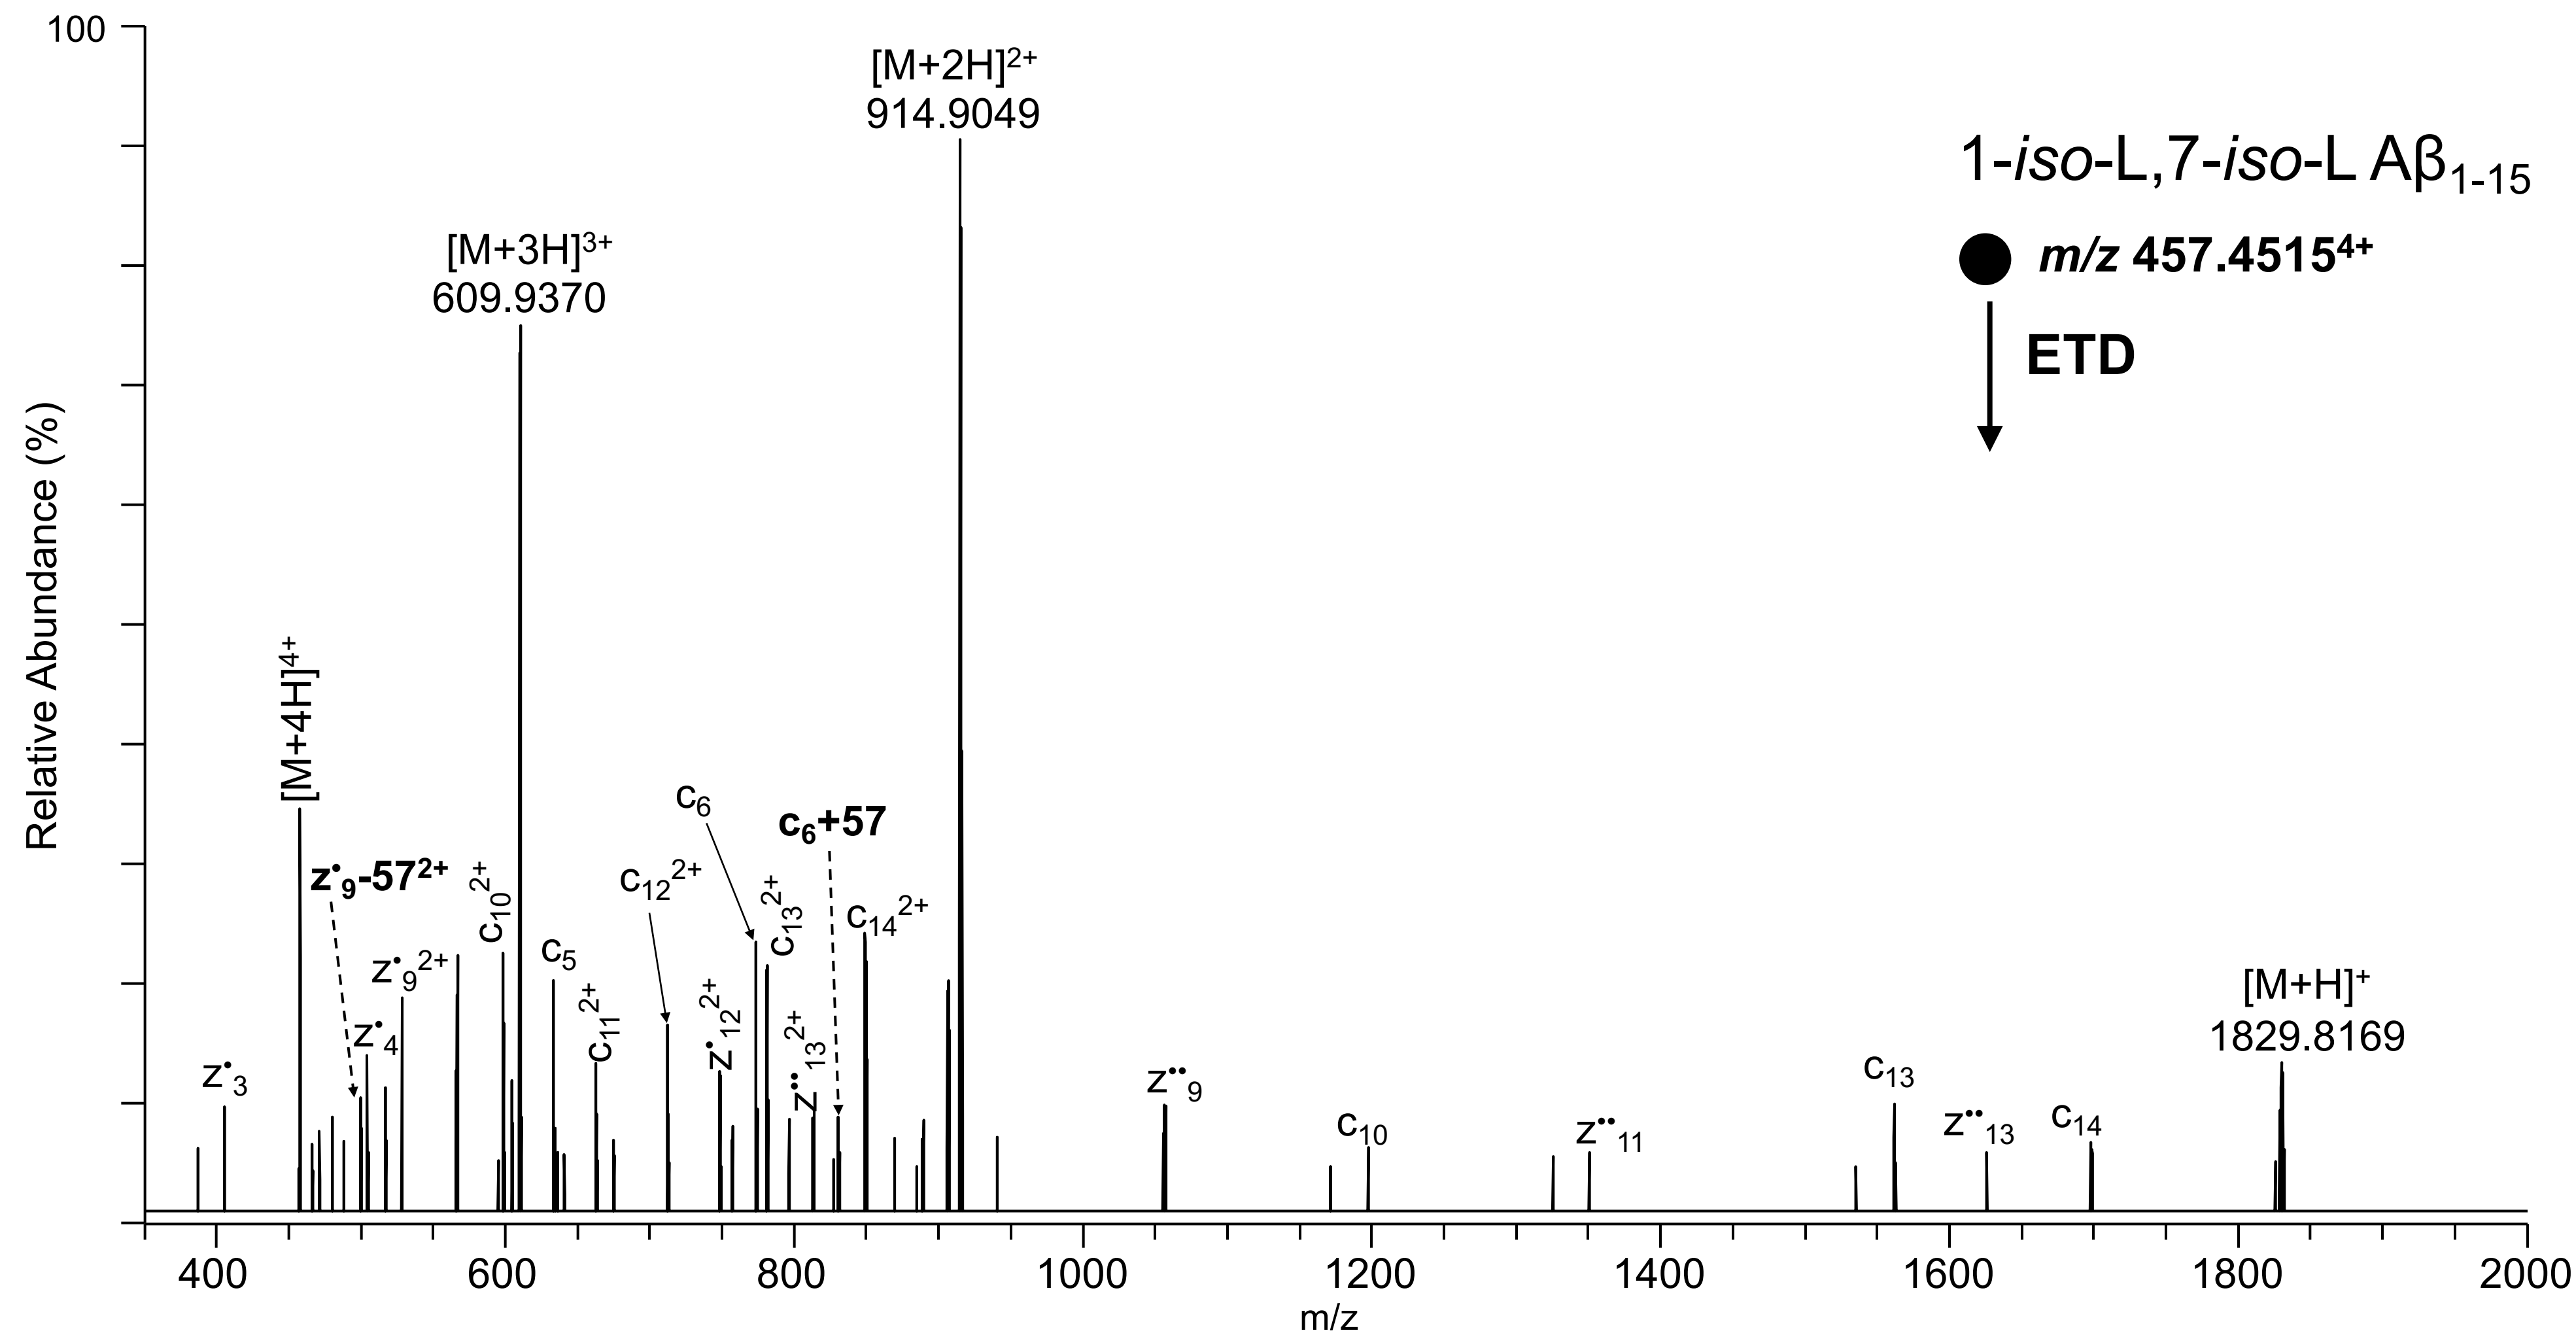

iD A E F R(+10) H iD S G Y E V H H Q

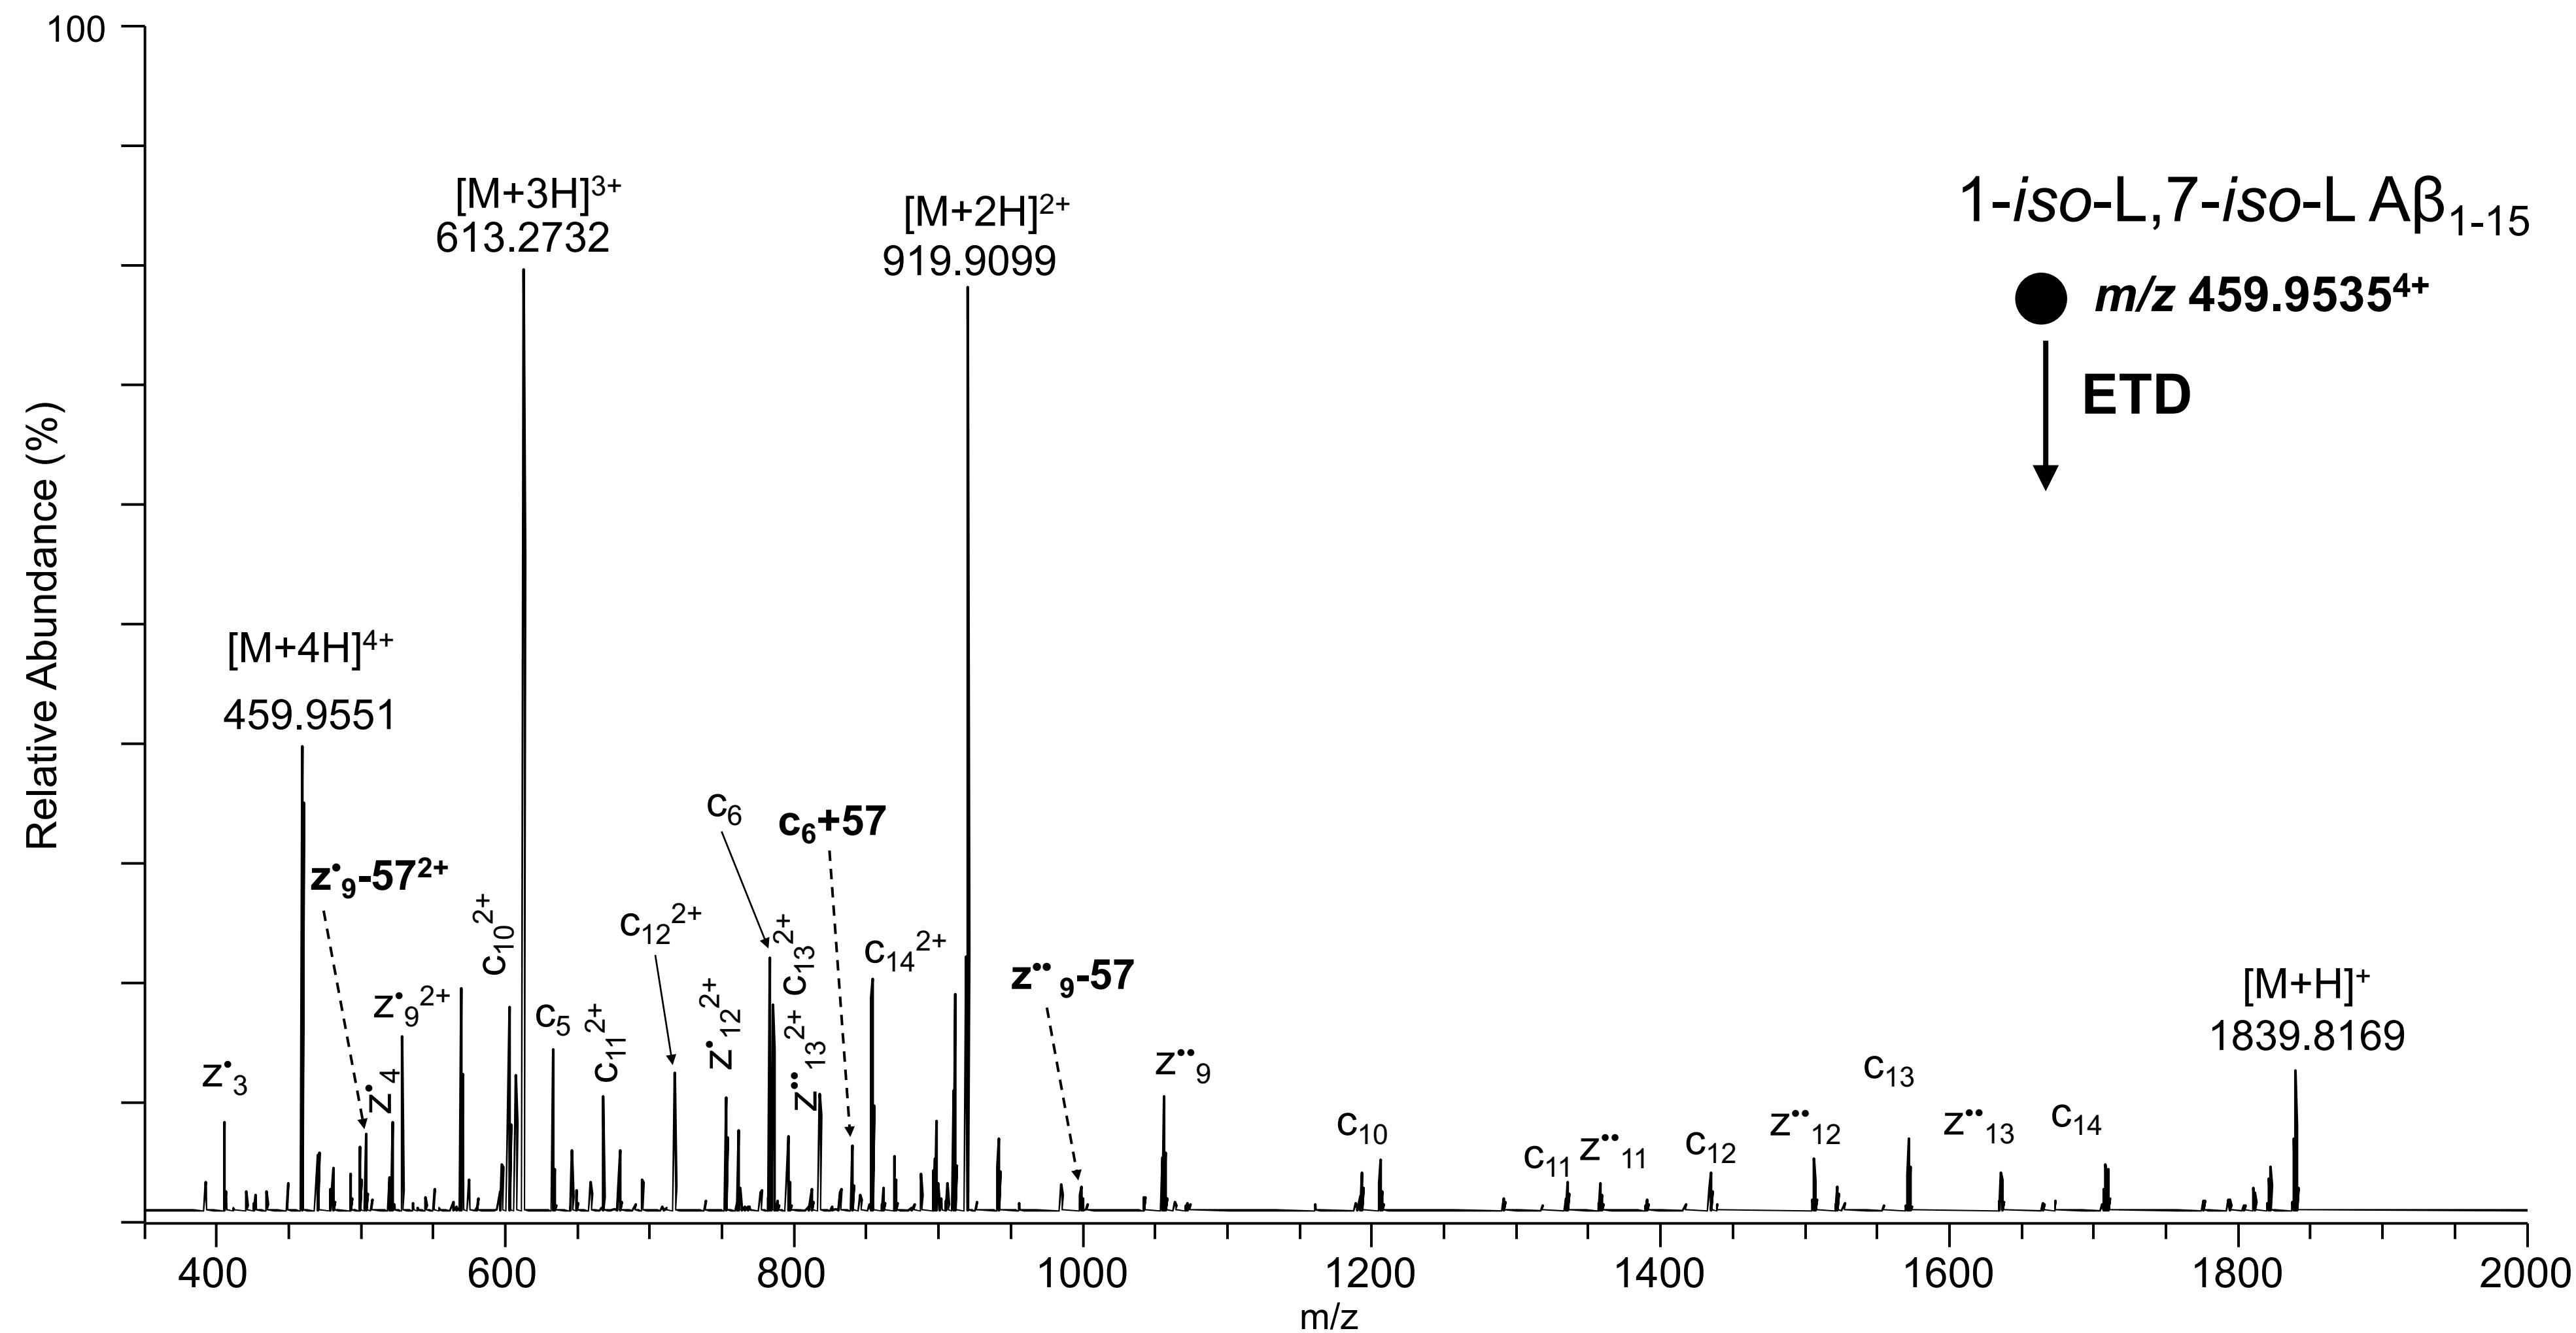

id **A E F R H i D S G Y E V H H Q**

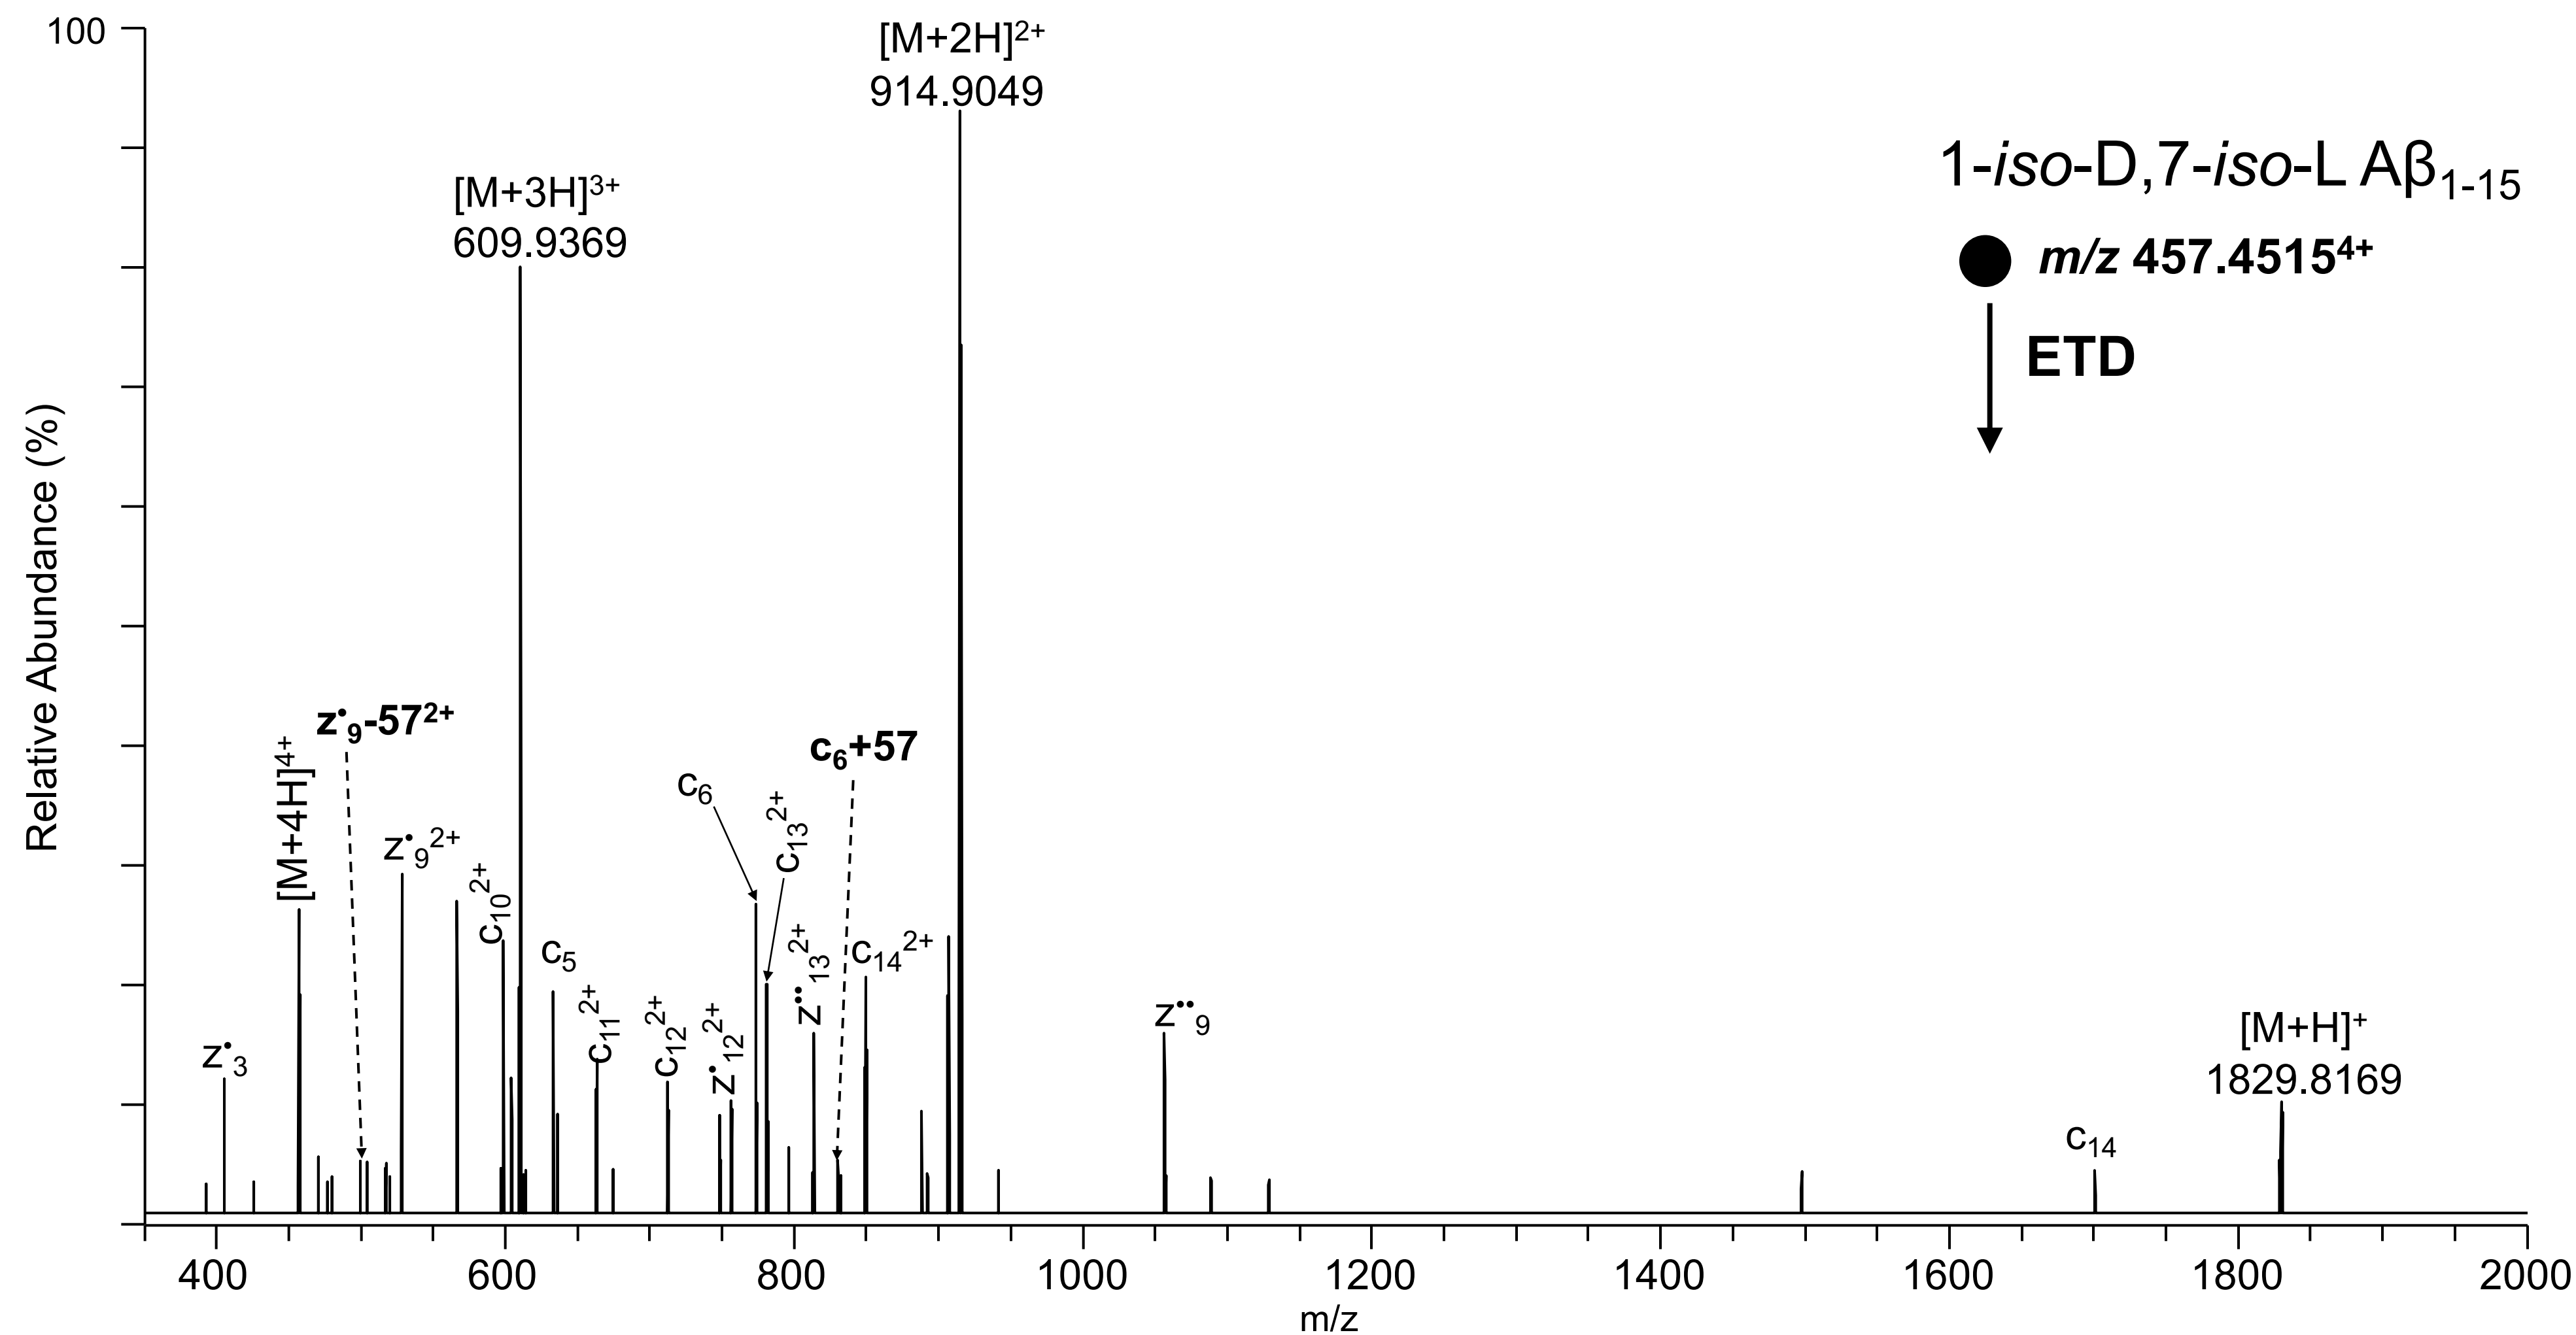

id **A** **E** **F** **R(+10)** **H** **iD** **S** **G** **Y** **E** **V** **H** **H** **Q**

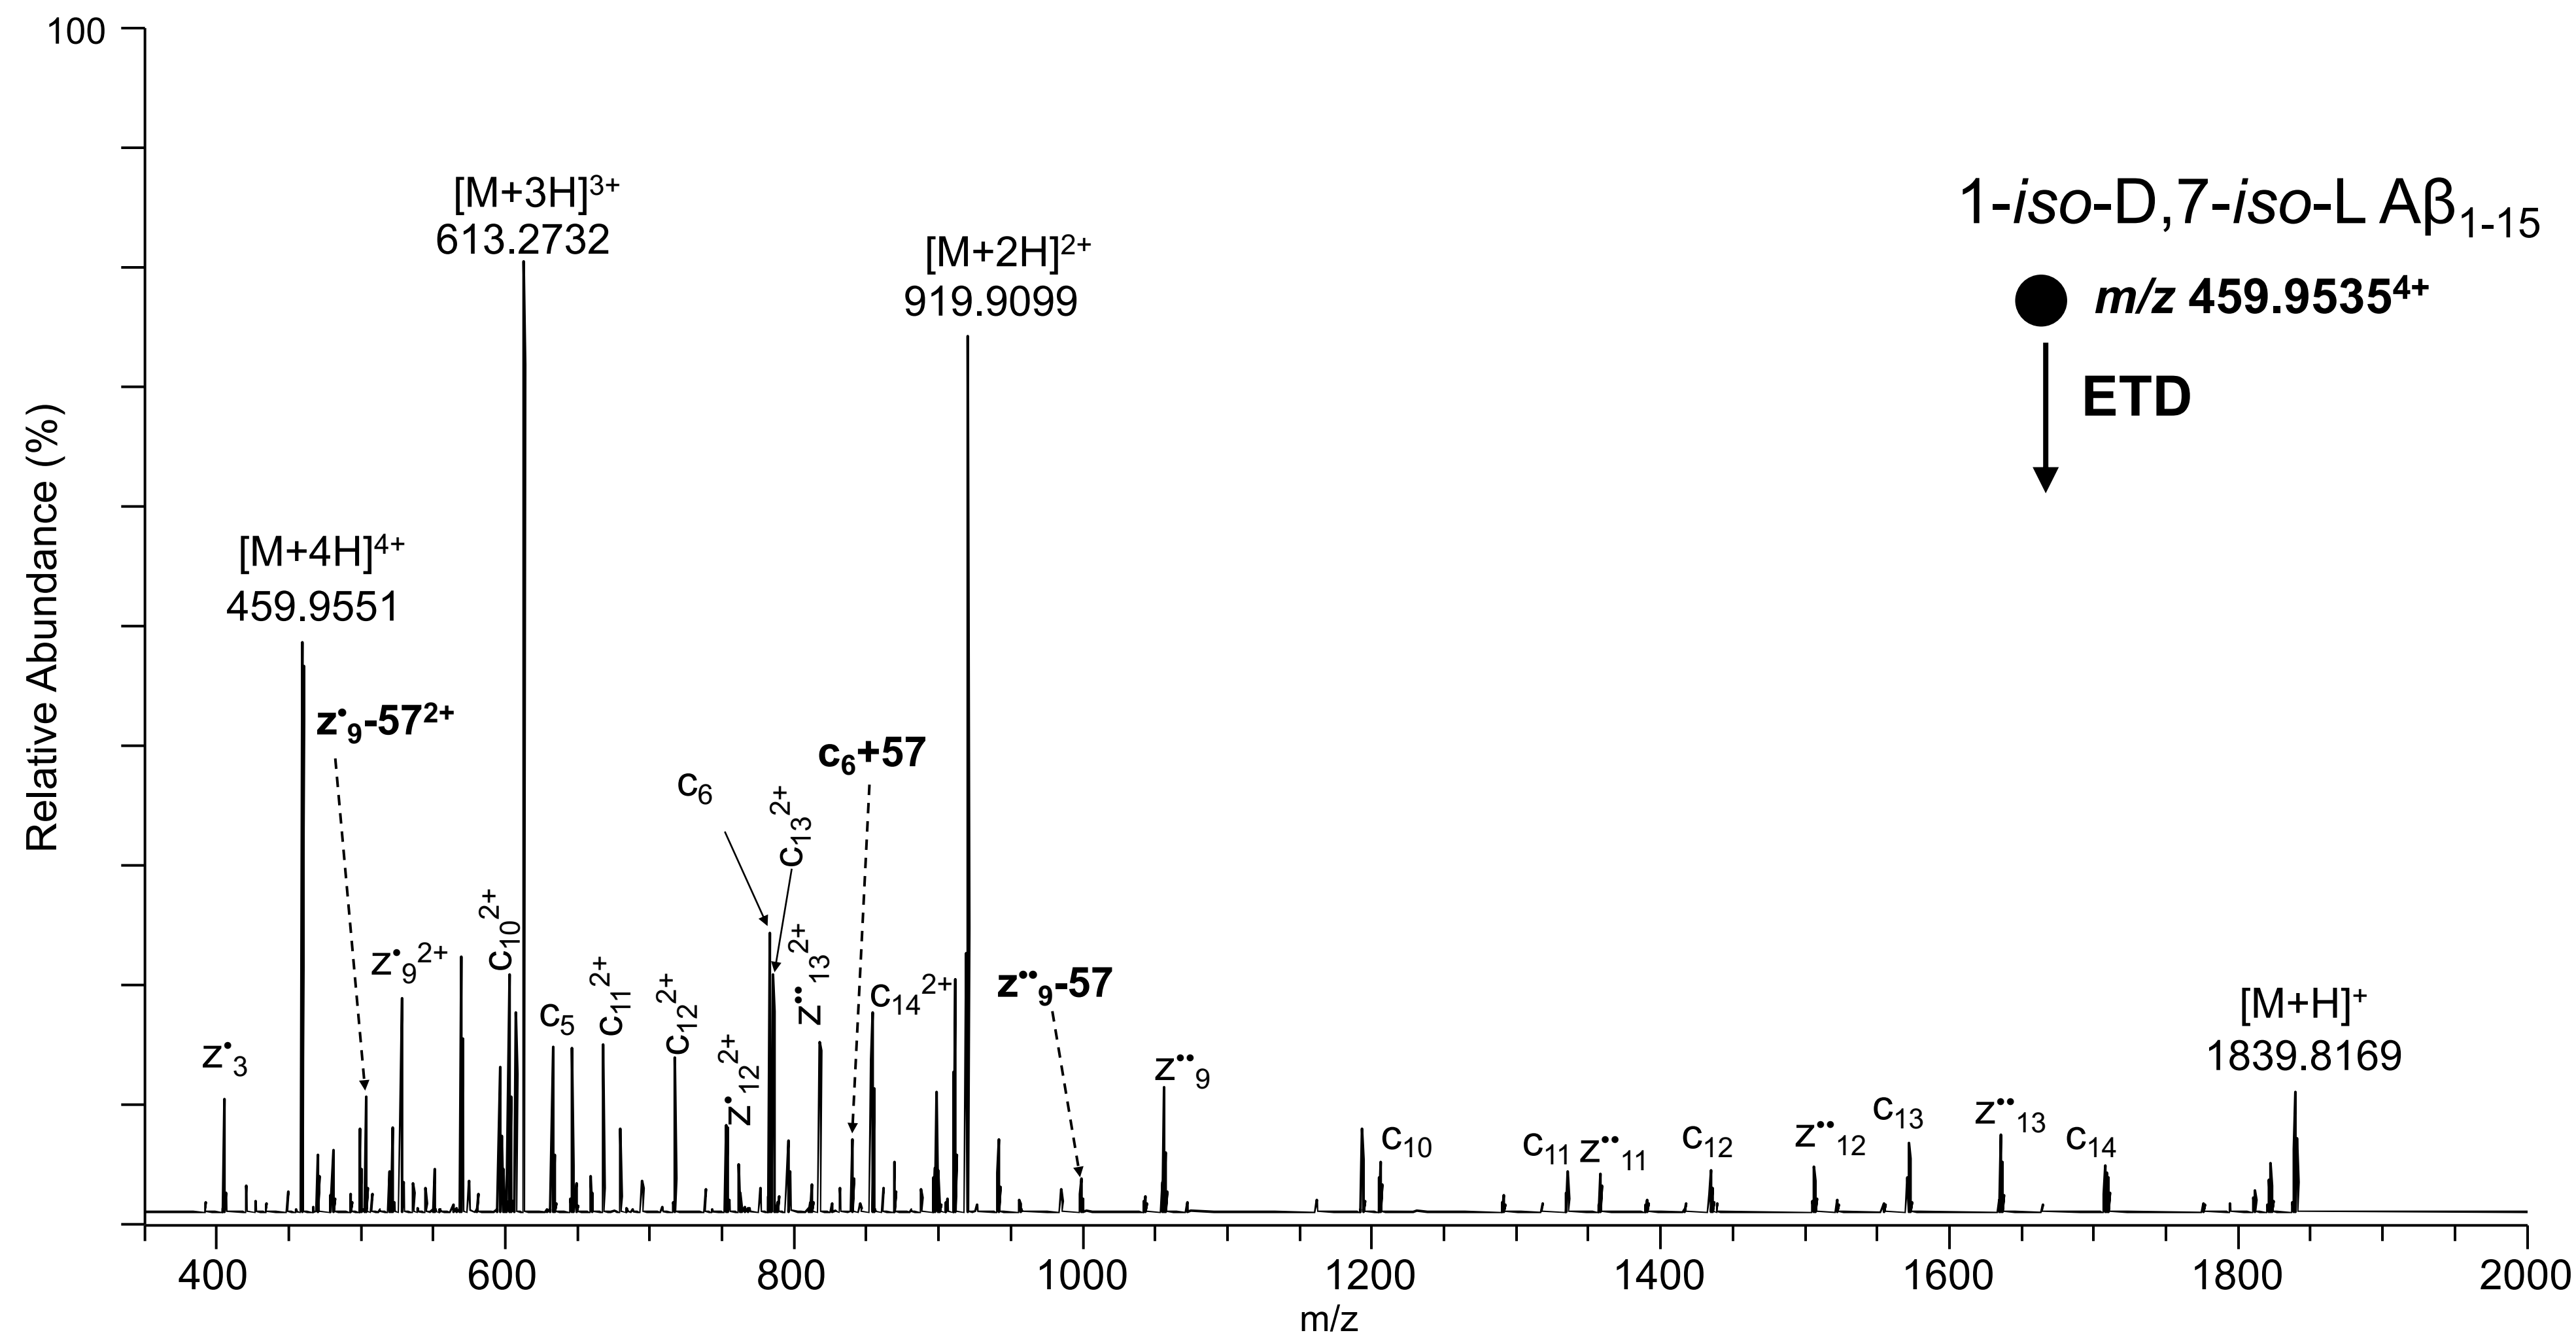



F R H D S G Y E V H H Q

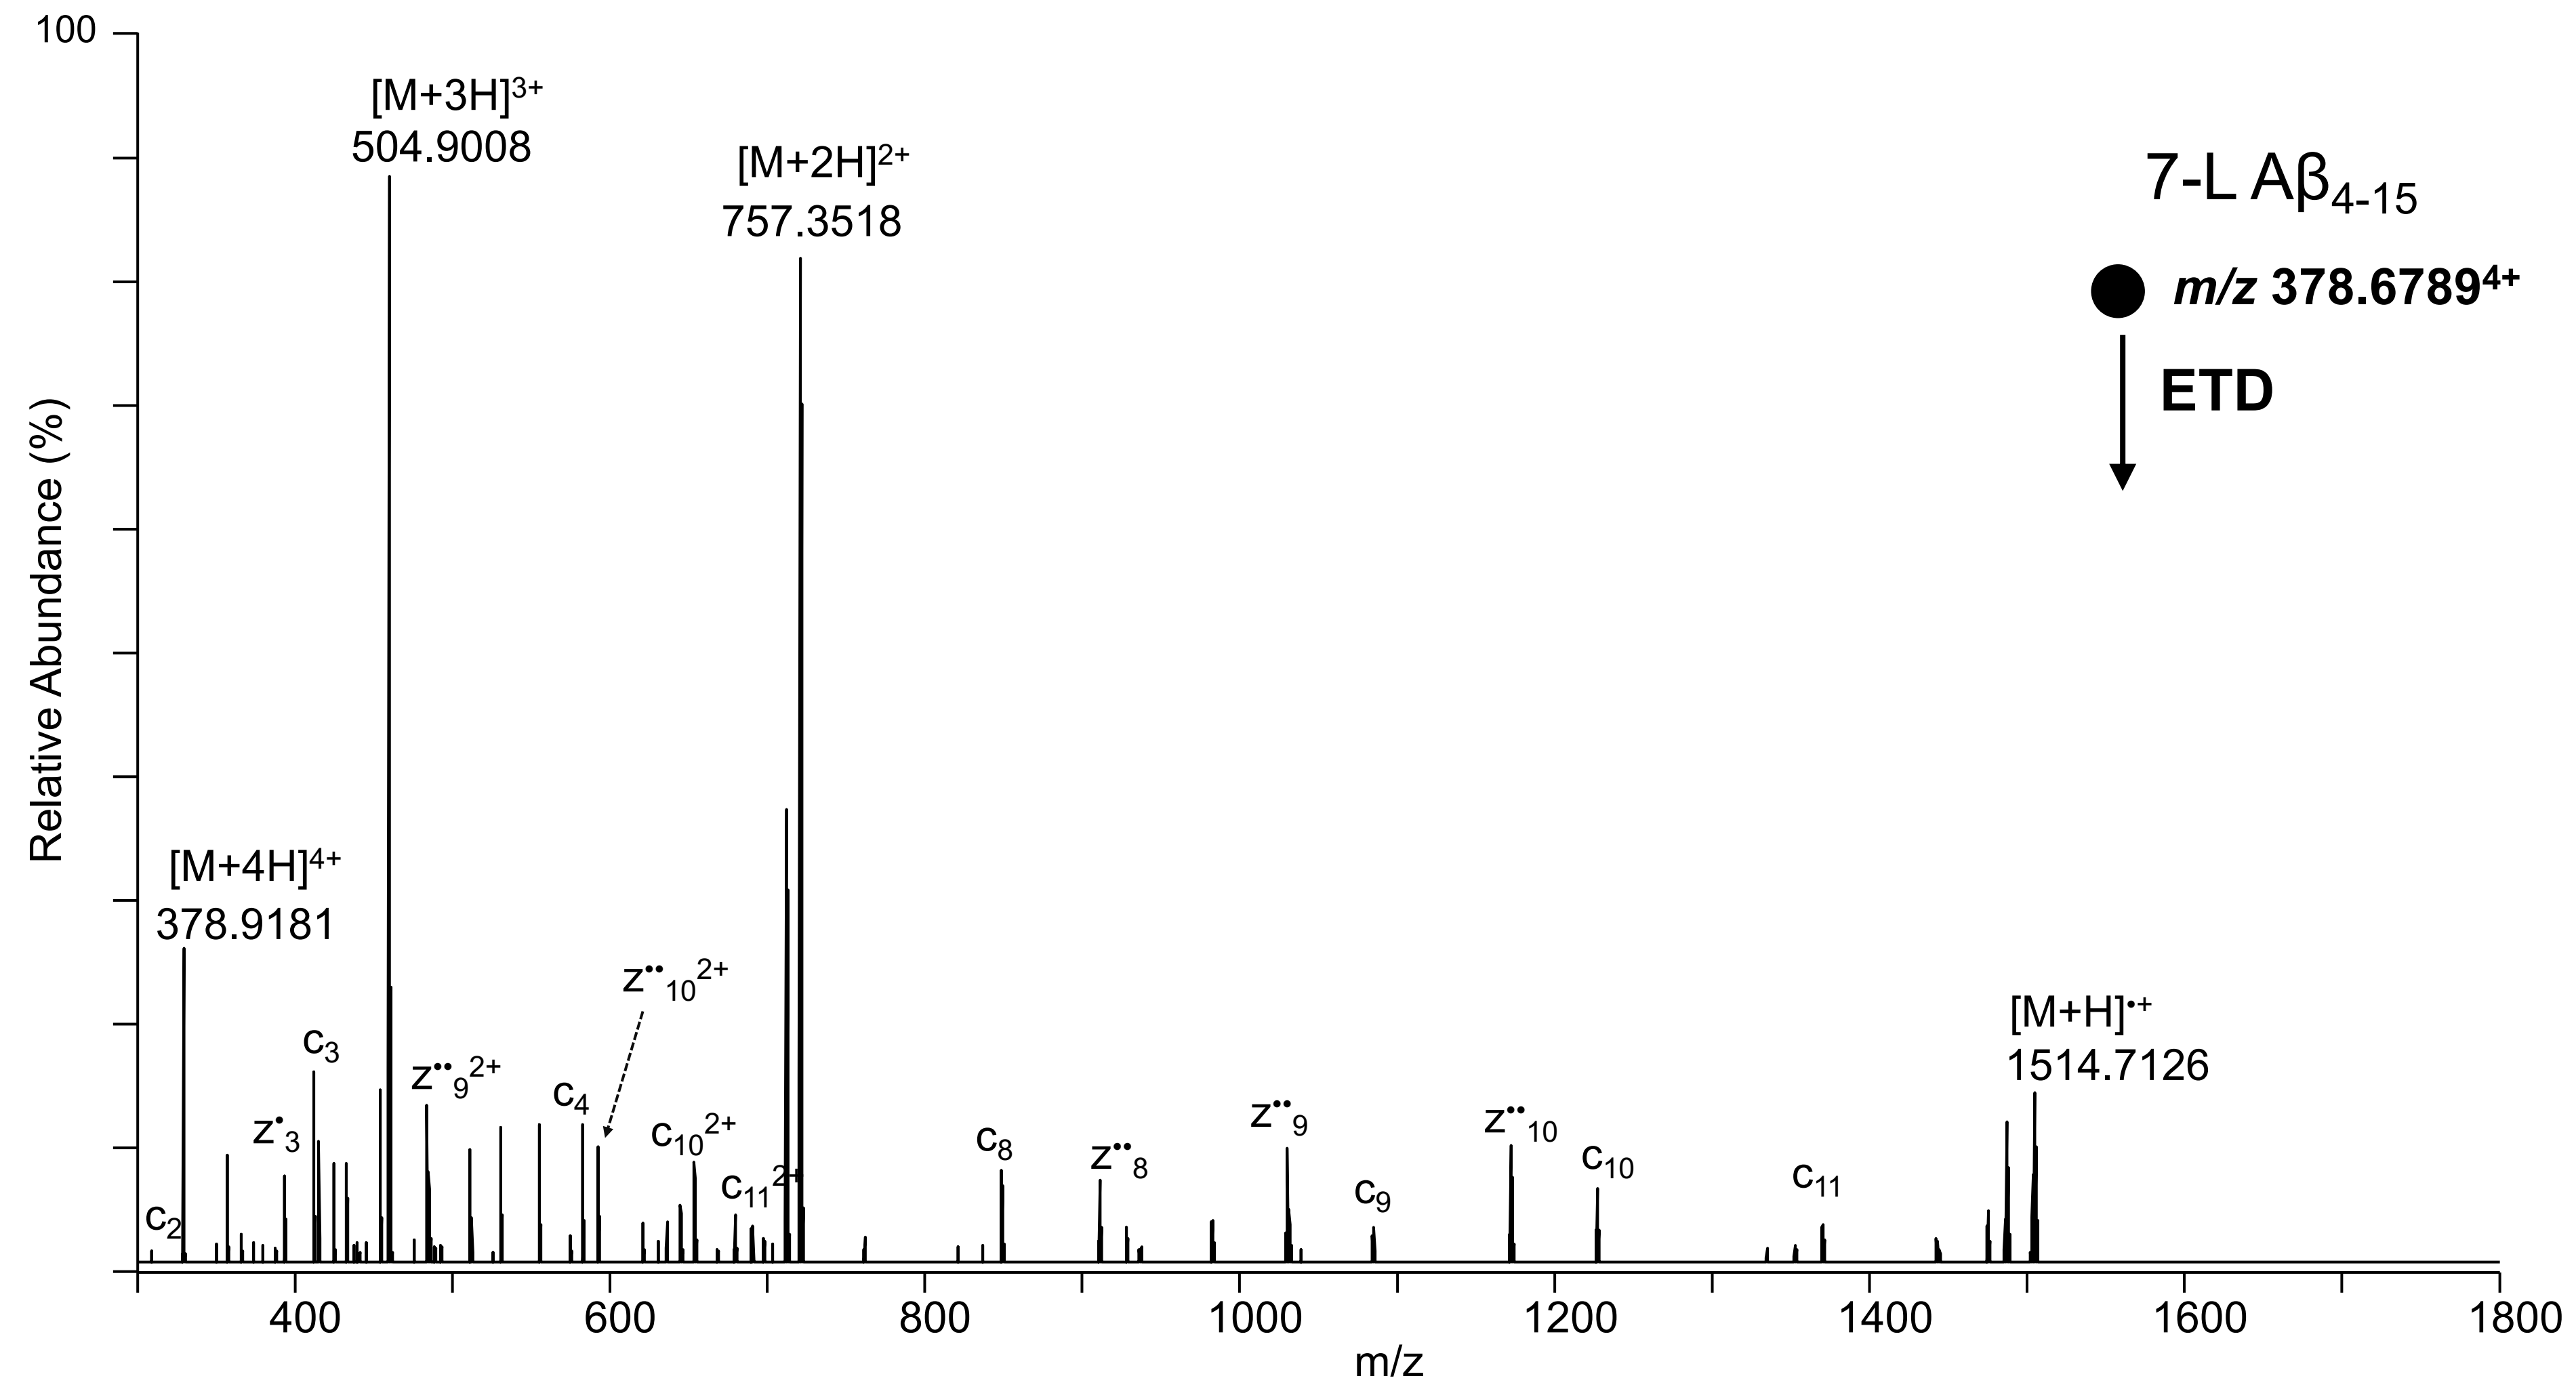

F R(+10) H D S G Y E V H H Q

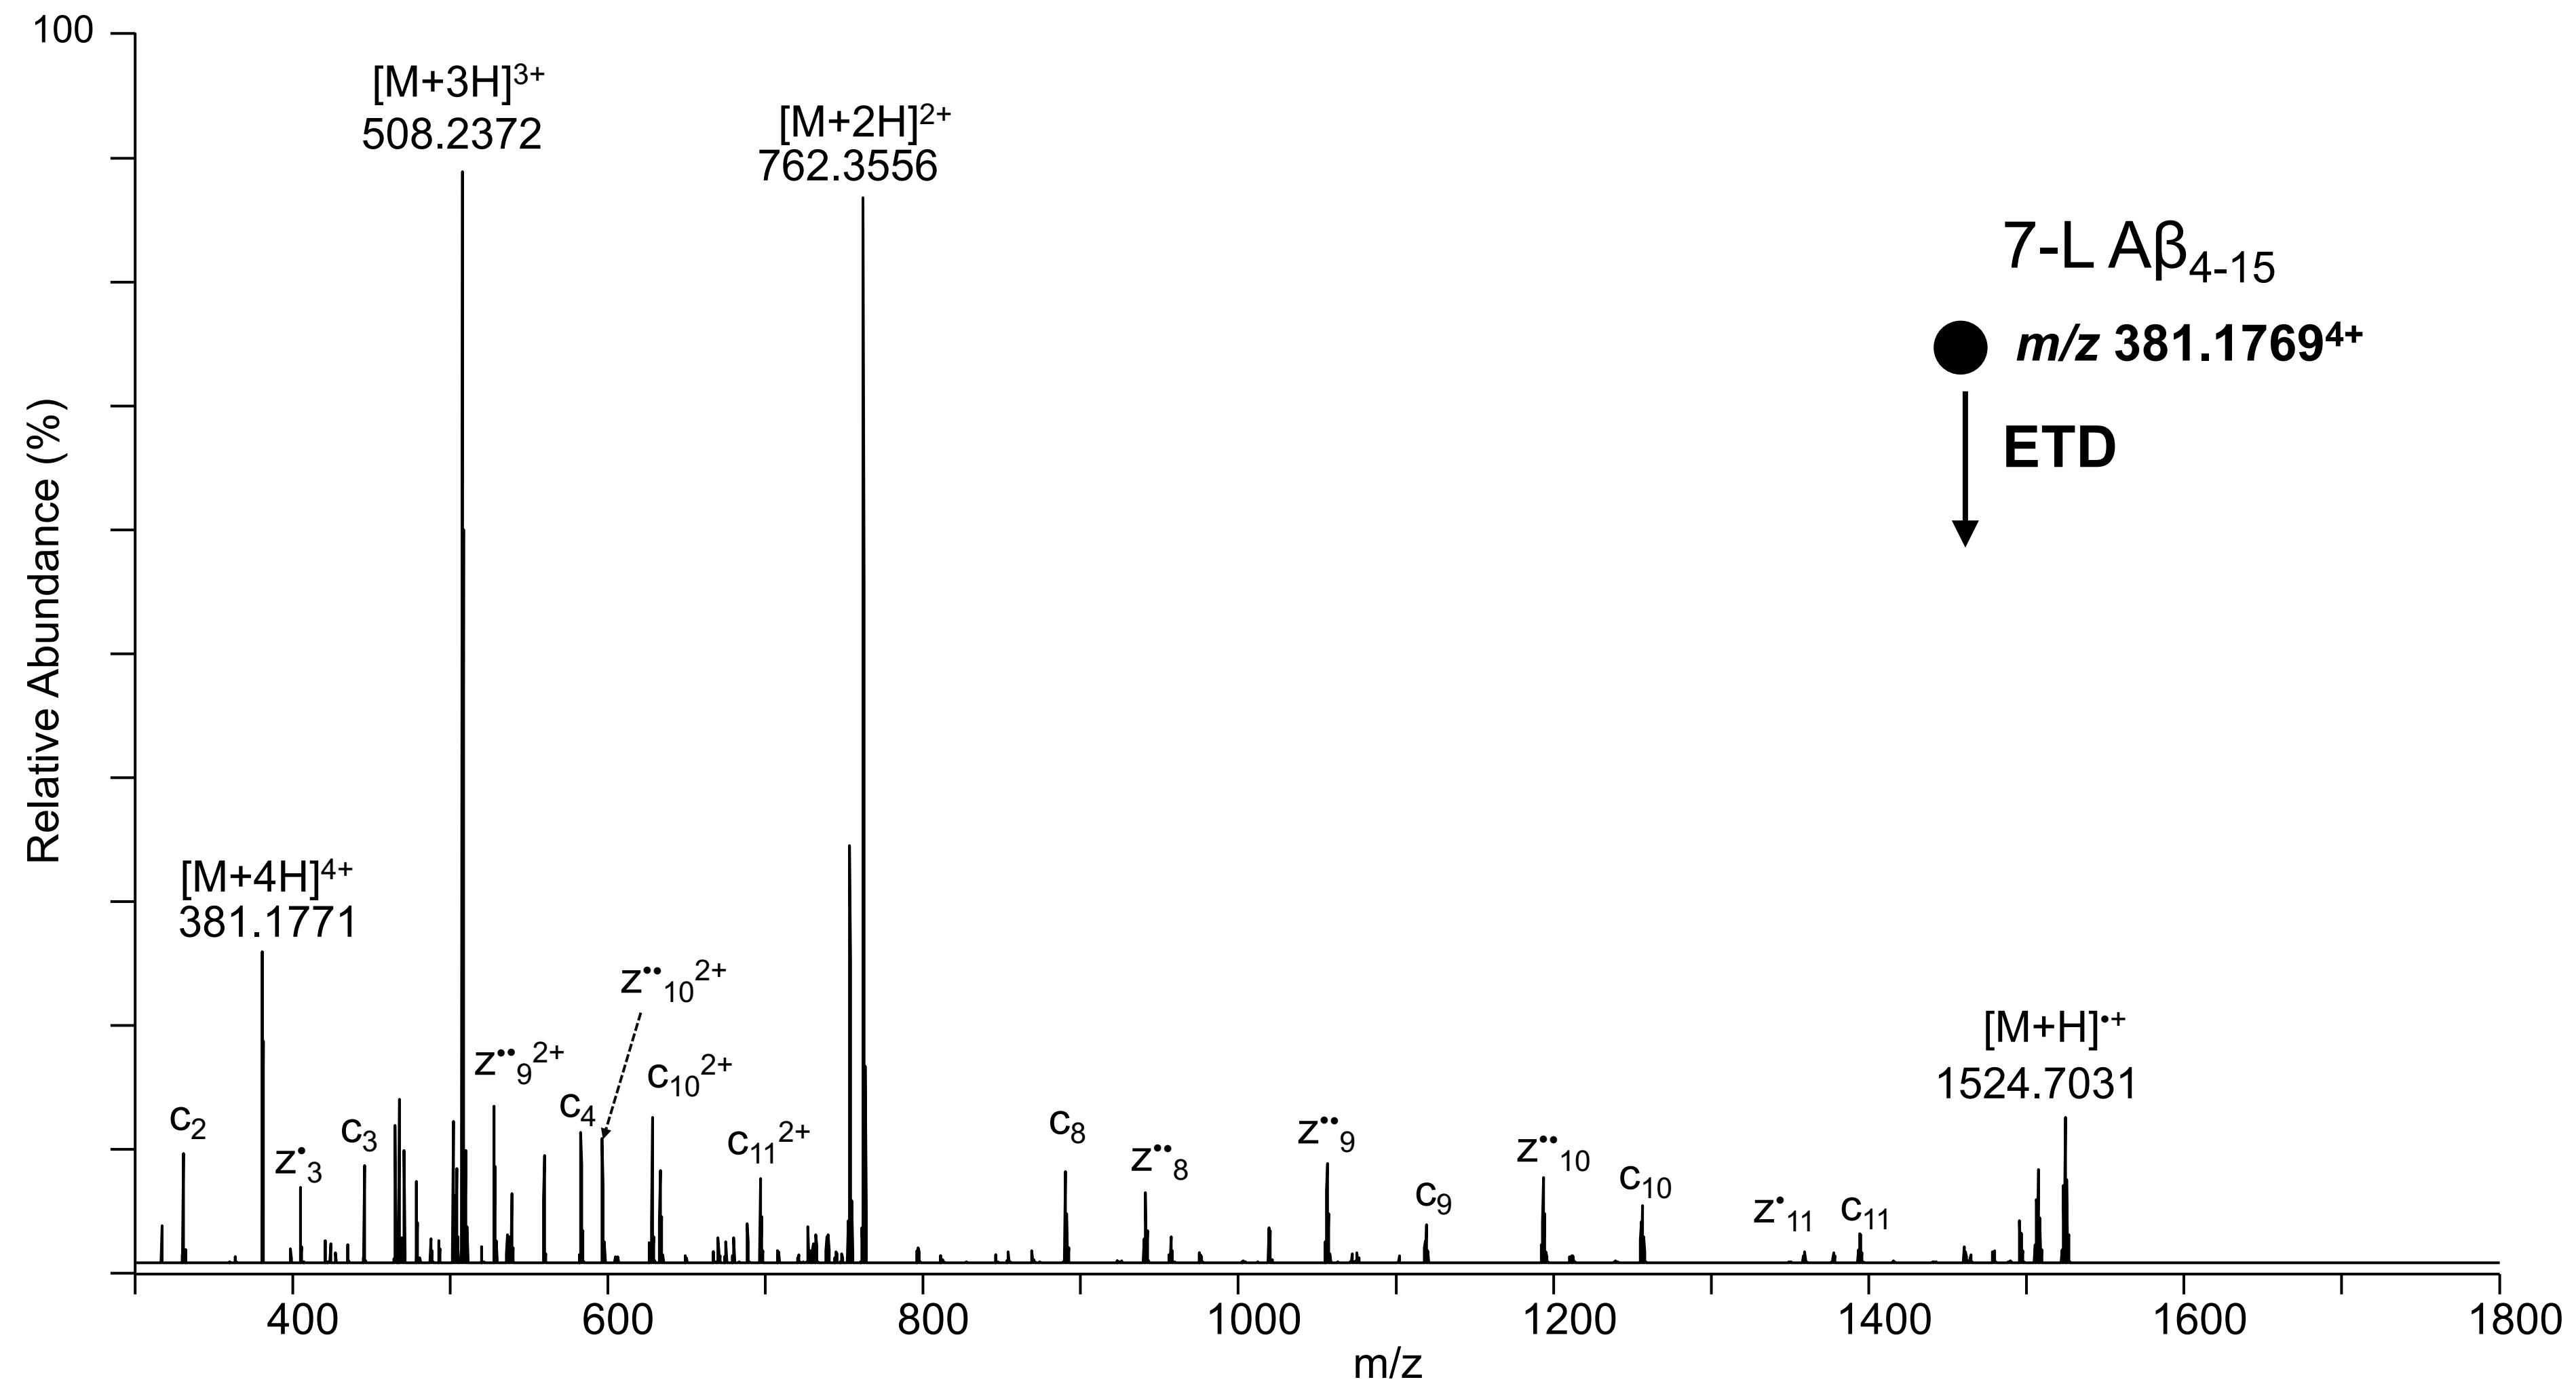

F R H **iD** S G Y E V H H Q

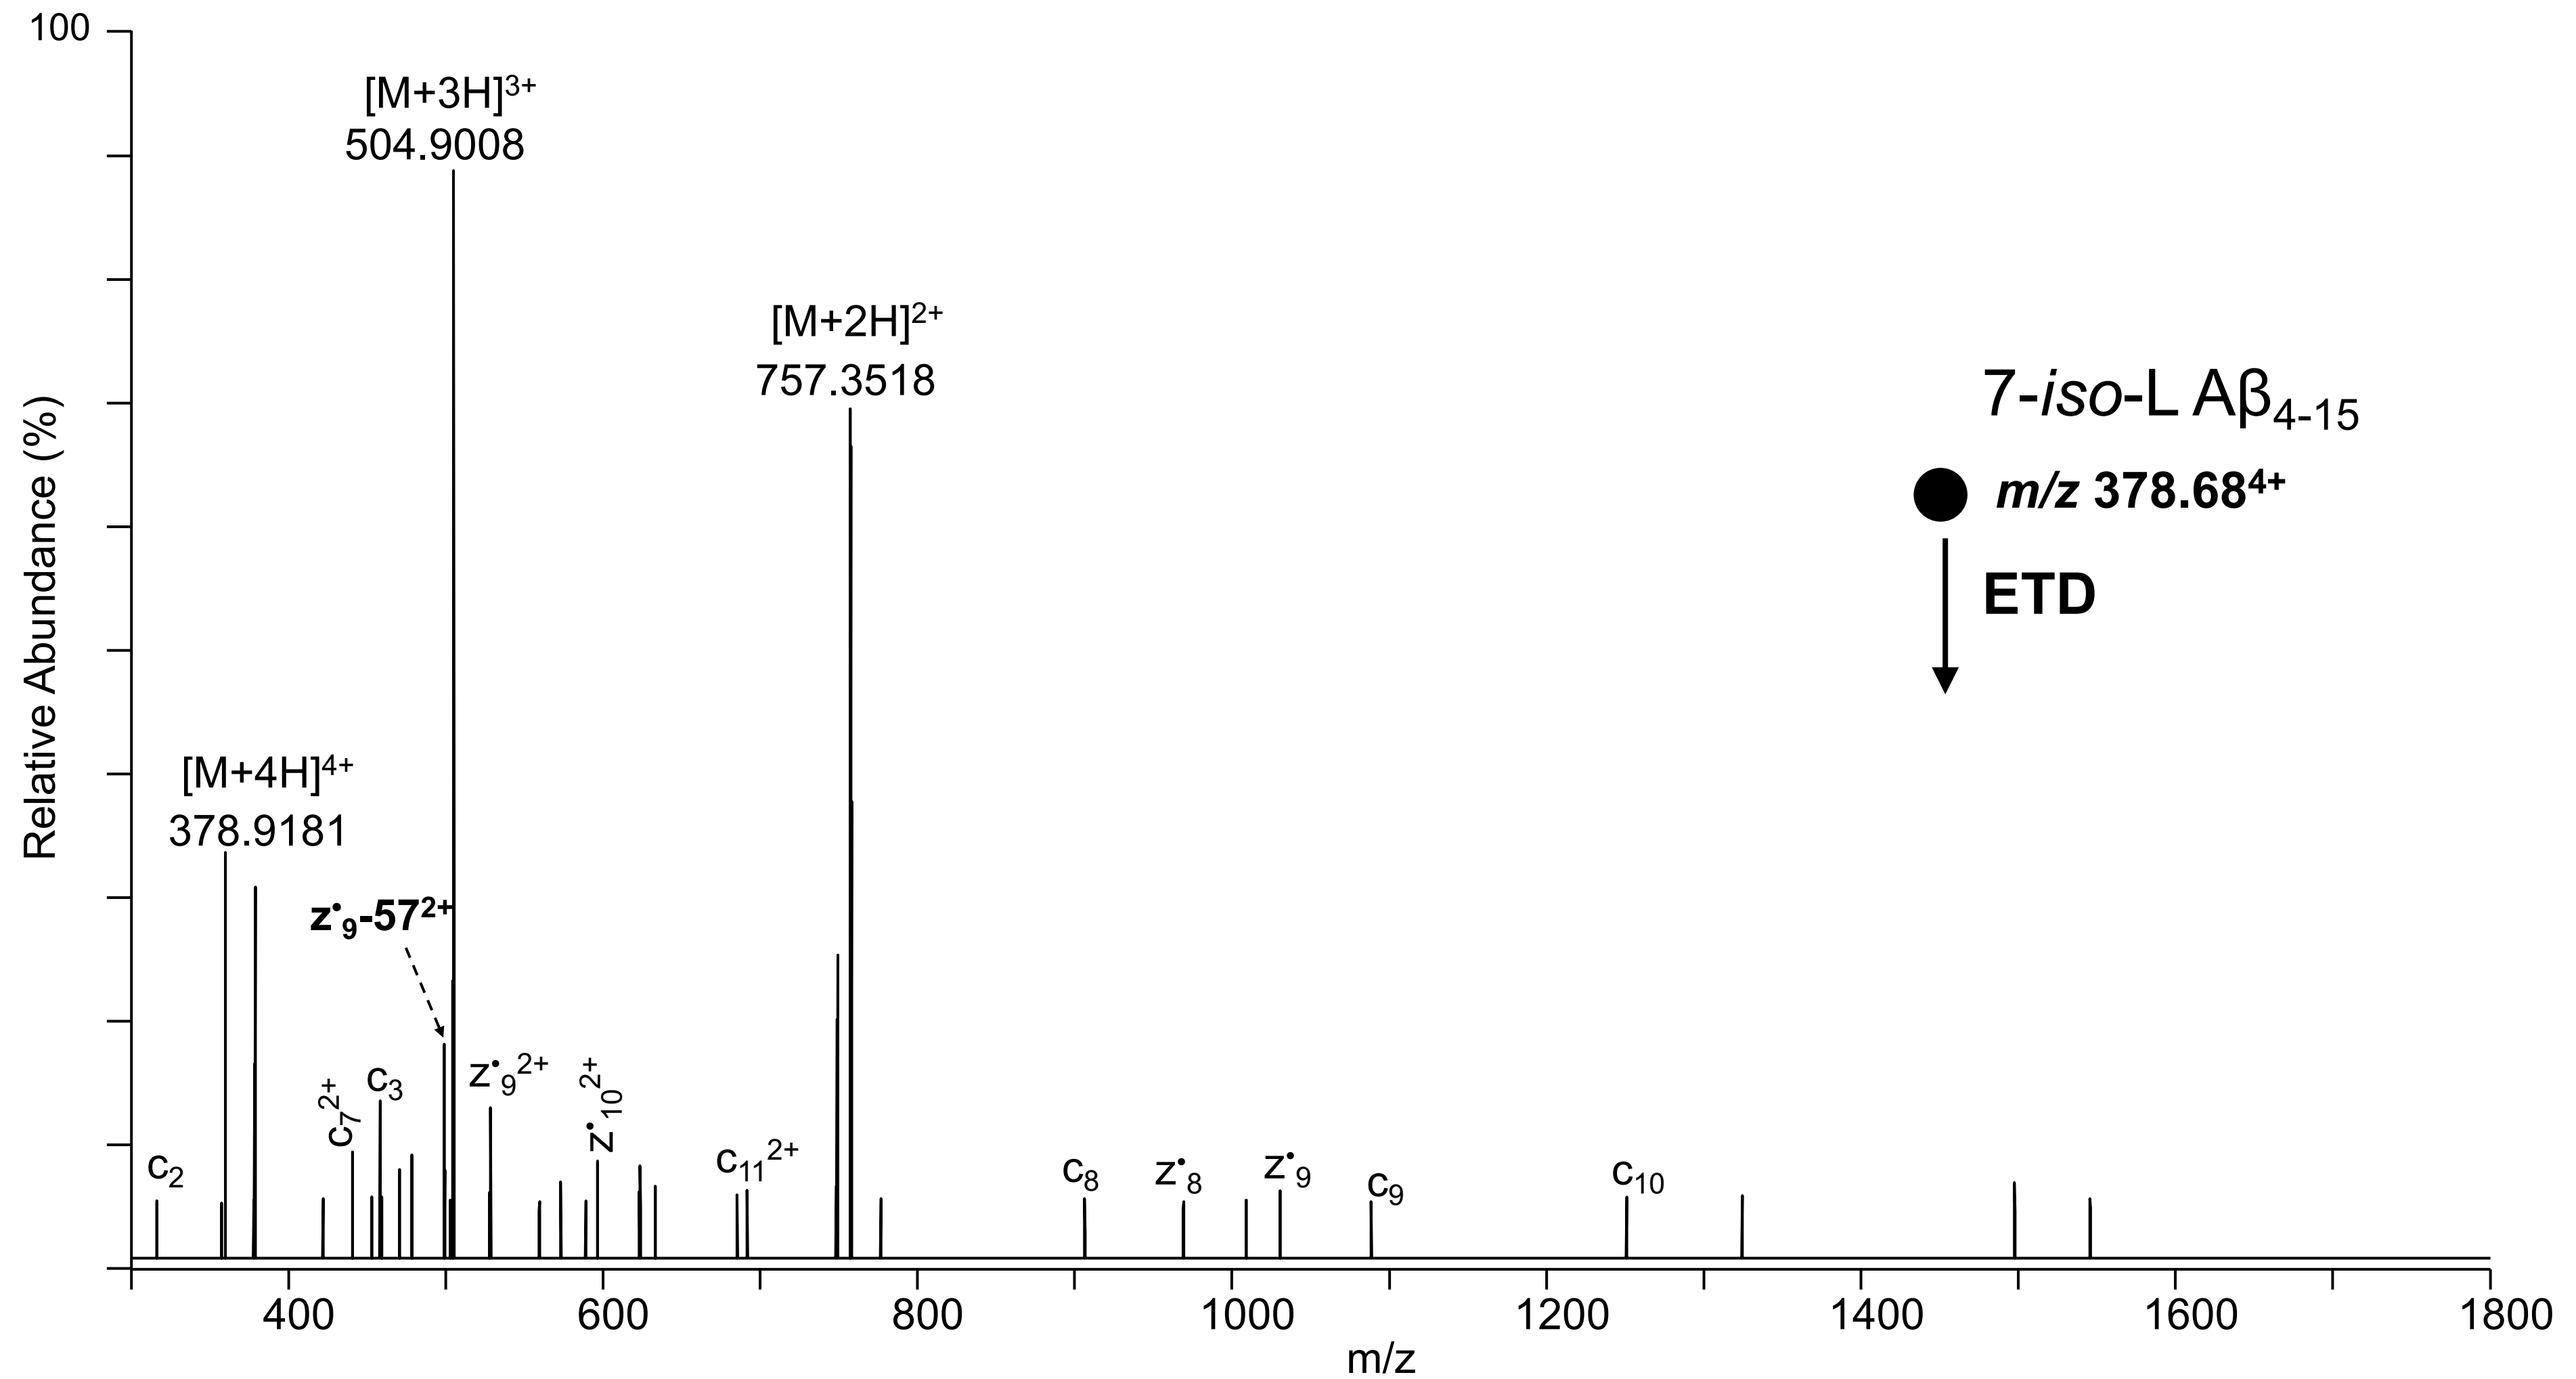

F R(+10) H iD S G Y E V H H Q

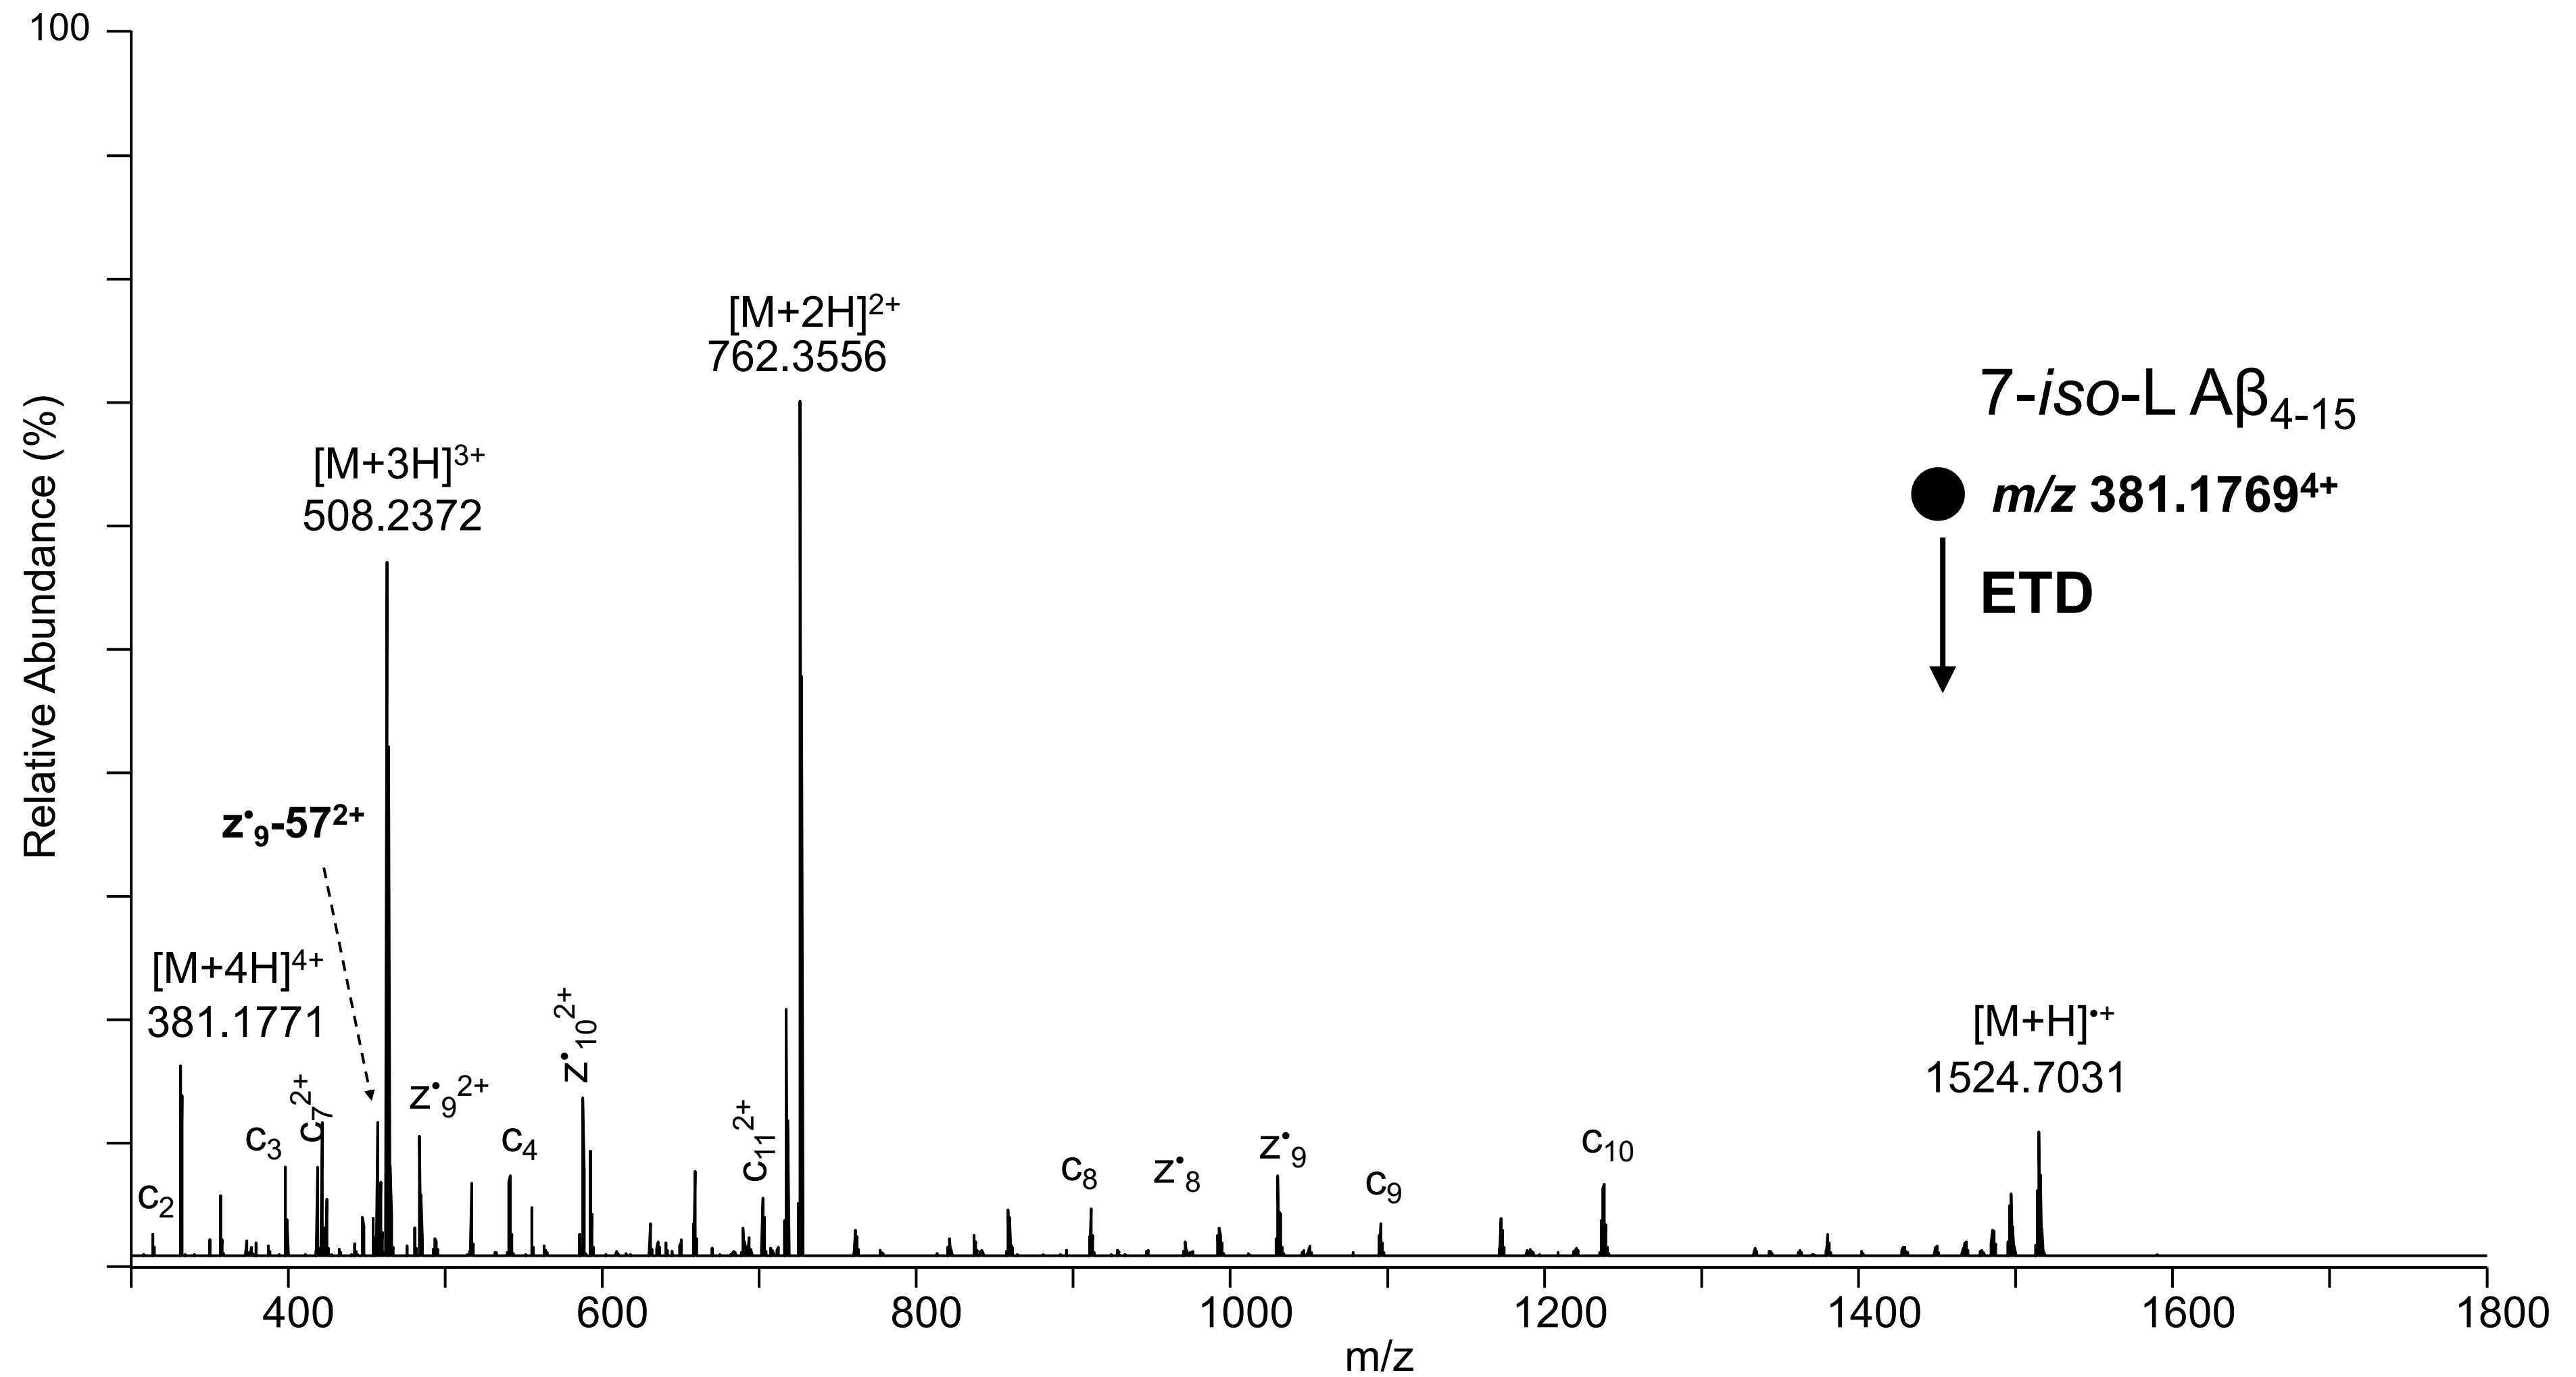

Supplement: fcab028_supplementary_data.zip [file fcab028_supplementary_data.zip]
